# Supplementary material
Source: PubMed Central journal article supplement (PMC7941253)
Supplement: jamaneurol-e210178-s003.pdf [file jamaneurol-e210178-s003.pdf]

\*Indicates required information. Only first name, last name, and suffix will appear in PubMed.

| <b>Group Name(s):* SPRINT Research Group</b> |            |         |                  |                                               |                                          |                                                         |                                          |                                  |
|----------------------------------------------|------------|---------|------------------|-----------------------------------------------|------------------------------------------|---------------------------------------------------------|------------------------------------------|----------------------------------|
| First Name, Middle Initial*                  | Last Name* | Suffix* | Academic Degrees | Institution                                   | Location (city, state/province, country) | Role or Contribution, eg, chair, principal investigator | Group (for manuscripts with more than 1) | Subgroup, eg, Steering Committee |
| Paul                                         | Whelton    |         |                  | Tulane University                             |                                          | Chair                                                   |                                          | Study Leadership                 |
| Karen C.                                     | Johnson    |         |                  | University of Tennessee Health Science Center |                                          | Vice-Chair                                              |                                          | Study Leadership                 |
| Joni                                         | Snyder     |         |                  | National Institutes of Health                 |                                          | Project Officer                                         |                                          | Program Office                   |
| Diane                                        | Bild       |         |                  | National Institutes of Health                 |                                          | Project Scientist                                       |                                          | Program Office                   |
| Denise                                       | Bonds      |         |                  | National Institutes of Health                 |                                          | Project Scientist                                       |                                          | Program Office                   |
| Nakela                                       | Cook       |         |                  | National Institutes of Health                 |                                          | Project Scientist                                       |                                          | Program Office                   |
| Jeffrey                                      | Cutler     |         |                  | National Institutes of Health                 |                                          | Project Scientist                                       |                                          | Program Office                   |
| Lawrence                                     | Fine       |         |                  | National Institutes of Health                 |                                          | Project Scientist                                       |                                          | Program Office                   |
| Peter                                        | Kaufmann   |         |                  | National Institutes of Health                 |                                          | Project Scientist                                       |                                          | Program Office                   |
| Paul                                         | Kimmel     |         |                  | National Institutes of Health                 |                                          | Project Scientist                                       |                                          | Program Office                   |
| Claudia                                      | Moy        |         |                  | National Institutes of Health                 |                                          | Project Scientist                                       |                                          | Program Office                   |
| William                                      | Riley      |         |                  | National Institutes of Health                 |                                          | Project Scientist                                       |                                          | Program Office                   |
| Laurie                                       | Ryan       |         |                  | National Institutes of Health                 |                                          | Project Scientist                                       |                                          | Program Office                   |
| Eser                                         | Tolunay    |         |                  | National Institutes of Health                 |                                          | Project Scientist                                       |                                          | Program Office                   |
| Song                                         | Yang       |         |                  | National Institutes of Health                 |                                          | Biostatistician                                         |                                          | Program Office                   |
| David                                        | Reboussin  |         |                  | Wake Forest University Health Sciences        |                                          | Principal Investigator                                  |                                          | Central Coordinating Center      |
| Walter T.                                    | Ambrosius  |         |                  | Wake Forest University Health Sciences        |                                          | Co-Investigator                                         |                                          | Central Coordinating Center      |
| William                                      | Applegate  |         |                  | Wake Forest University Health Sciences        |                                          | Co-Investigator                                         |                                          | Central Coordinating Center      |
| Greg                                         | Evans      |         |                  | Wake Forest University Health Sciences        |                                          | Co-Investigator                                         |                                          | Central Coordinating Center      |
| Capri                                        | Foy        |         |                  | Wake Forest University Health Sciences        |                                          | Co-Investigator                                         |                                          | Central Coordinating Center      |
| Barry I.                                     | Freedman   |         |                  | Wake Forest University Health Sciences        |                                          | Co-Investigator                                         |                                          | Central Coordinating Center      |
| Dalane                                       | Kitzman    |         |                  | Wake Forest University Health Sciences        |                                          | Co-Investigator                                         |                                          | Central Coordinating Center      |
| Mary                                         | Lyles      |         |                  | Wake Forest University Health Sciences        |                                          | Co-Investigator                                         |                                          | Central Coordinating Center      |
| Steve                                        | Rapp       |         |                  | Wake Forest University Health Sciences        |                                          | Co-Investigator                                         |                                          | Central Coordinating Center      |

## Supplementary Online Content: Nonauthor Collaborators

\*Indicates required information. Only first name, last name, and suffix will appear in PubMed.

| First Name, Middle Initial* | Last Name*  | Suffix* | Academic Degrees | Institution                            | Location (city, state/province, country) | Role or Contribution, eg, chair, principal investigator | Group (for manuscripts with more than 1) | Subgroup, eg, Steering Committee |
|-----------------------------|-------------|---------|------------------|----------------------------------------|------------------------------------------|---------------------------------------------------------|------------------------------------------|----------------------------------|
| Scott                       | Rushing     |         |                  | Wake Forest University Health Sciences |                                          | Co-Investigator                                         |                                          | Central Coordinating Center      |
| Neel                        | Shah        |         |                  | Wake Forest University Health Sciences |                                          | Co-Investigator                                         |                                          | Central Coordinating Center      |
| Kaycee M.                   | Sink        |         |                  | Wake Forest University Health Sciences |                                          | Co-Investigator                                         |                                          | Central Coordinating Center      |
| Mara                        | Vitolins    |         |                  | Wake Forest University Health Sciences |                                          | Co-Investigator                                         |                                          | Central Coordinating Center      |
| Lynne                       | Wagenknecht |         |                  | Wake Forest University Health Sciences |                                          | Co-Investigator                                         |                                          | Central Coordinating Center      |
| Valerie                     | Wilson      |         |                  | Wake Forest University Health Sciences |                                          | Co-Investigator                                         |                                          | Central Coordinating Center      |
| Letitia                     | Perdue      |         |                  | Wake Forest University Health Sciences |                                          | Project Coordinator                                     |                                          | Central Coordinating Center      |
| Nancy                       | Woolard     |         |                  | Wake Forest University Health Sciences |                                          | Project Coordinator                                     |                                          | Central Coordinating Center      |
| Tim                         | Craven      |         |                  | Wake Forest University Health Sciences |                                          | Biostatistician                                         |                                          | Central Coordinating Center      |
| Katelyn                     | Garcia      |         |                  | Wake Forest University Health Sciences |                                          | Biostatistician                                         |                                          | Central Coordinating Center      |
| Laura                       | Lovato      |         |                  | Wake Forest University Health Sciences |                                          | Biostatistician                                         |                                          | Central Coordinating Center      |
| Jill                        | Newman      |         |                  | Wake Forest University Health Sciences |                                          | Biostatistician                                         |                                          | Central Coordinating Center      |
| James                       | Lovato      |         |                  | Wake Forest University Health Sciences |                                          | Biostatistician                                         |                                          | Central Coordinating Center      |
| Lingyi                      | Lu          |         |                  | Wake Forest University Health Sciences |                                          | Biostatistician                                         |                                          | Central Coordinating Center      |
| Chris                       | McLouth     |         |                  | Wake Forest University Health Sciences |                                          | Biostatistician                                         |                                          | Central Coordinating Center      |
| Greg                        | Russell     |         |                  | Wake Forest University Health Sciences |                                          | Biostatistician                                         |                                          | Central Coordinating Center      |
| Bobby                       | Amoroso     |         |                  | Wake Forest University Health Sciences |                                          | Programmer                                              |                                          | Central Coordinating Center      |
| Patty                       | Davis       |         |                  | Wake Forest University Health Sciences |                                          | Programmer                                              |                                          | Central Coordinating Center      |

## Supplementary Online Content: Nonauthor Collaborators

\*Indicates required information. Only first name, last name, and suffix will appear in PubMed.

| First Name, Middle Initial* | Last Name*  | Suffix* | Academic Degrees | Institution                            | Location (city, state/province, country) | Role or Contribution, eg, chair, principal investigator | Group (for manuscripts with more than 1) | Subgroup, eg, Steering Committee |
|-----------------------------|-------------|---------|------------------|----------------------------------------|------------------------------------------|---------------------------------------------------------|------------------------------------------|----------------------------------|
| Jason                       | Griffin     |         |                  | Wake Forest University Health Sciences |                                          | Programmer                                              |                                          | Central Coordinating Center      |
| Darrin                      | Harris      |         |                  | Wake Forest University Health Sciences |                                          | Programmer                                              |                                          | Central Coordinating Center      |
| Mark                        | King        |         |                  | Wake Forest University Health Sciences |                                          | Programmer                                              |                                          | Central Coordinating Center      |
| Kathy                       | Lane        |         |                  | Wake Forest University Health Sciences |                                          | Programmer                                              |                                          | Central Coordinating Center      |
| Wes                         | Roberson    |         |                  | Wake Forest University Health Sciences |                                          | Programmer                                              |                                          | Central Coordinating Center      |
| Debbie                      | Steinberg   |         |                  | Wake Forest University Health Sciences |                                          | Programmer                                              |                                          | Central Coordinating Center      |
| Donna                       | Ashford     |         |                  | Wake Forest University Health Sciences |                                          | Project Manager                                         |                                          | Central Coordinating Center      |
| Phyllis                     | Babcock     |         |                  | Wake Forest University Health Sciences |                                          | Project Manager                                         |                                          | Central Coordinating Center      |
| Dana                        | Chamberlain |         |                  | Wake Forest University Health Sciences |                                          | Project Manager                                         |                                          | Central Coordinating Center      |
| Vickie                      | Christensen |         |                  | Wake Forest University Health Sciences |                                          | Project Manager                                         |                                          | Central Coordinating Center      |
| Loretta                     | Cloud       |         |                  | Wake Forest University Health Sciences |                                          | Project Manager                                         |                                          | Central Coordinating Center      |
| Christy                     | Collins     |         |                  | Wake Forest University Health Sciences |                                          | Project Manager                                         |                                          | Central Coordinating Center      |
| Delilah                     | Cook        |         |                  | Wake Forest University Health Sciences |                                          | Project Manager                                         |                                          | Central Coordinating Center      |
| Katherine                   | Currie      |         |                  | Wake Forest University Health Sciences |                                          | Project Manager                                         |                                          | Central Coordinating Center      |
| Debbie                      | Felton      |         |                  | Wake Forest University Health Sciences |                                          | Project Manager                                         |                                          | Central Coordinating Center      |
| Stacy                       | Harpe       |         |                  | Wake Forest University Health Sciences |                                          | Project Manager                                         |                                          | Central Coordinating Center      |
| Marjorie                    | Howard      |         |                  | Wake Forest University Health Sciences |                                          | Project Manager                                         |                                          | Central Coordinating Center      |
| Michelle                    | Lewis       |         |                  | Wake Forest University Health Sciences |                                          | Project Manager                                         |                                          | Central Coordinating Center      |

## Supplementary Online Content: Nonauthor Collaborators

\*Indicates required information. Only first name, last name, and suffix will appear in PubMed.

| First Name, Middle Initial* | Last Name*        | Suffix* | Academic Degrees | Institution                                                                         | Location (city, state/province, country) | Role or Contribution, eg, chair, principal investigator | Group (for manuscripts with more than 1) | Subgroup, eg, Steering Committee |
|-----------------------------|-------------------|---------|------------------|-------------------------------------------------------------------------------------|------------------------------------------|---------------------------------------------------------|------------------------------------------|----------------------------------|
| Pamela                      | Nance             |         |                  | Wake Forest University Health Sciences                                              |                                          | Project Manager                                         |                                          | Central Coordinating Center      |
| Nicole                      | Puccinelli-Ortega |         |                  | Wake Forest University Health Sciences                                              |                                          | Project Manager                                         |                                          | Central Coordinating Center      |
| Laurie                      | Russell           |         |                  | Wake Forest University Health Sciences                                              |                                          | Project Manager                                         |                                          | Central Coordinating Center      |
| Jennifer                    | Walker            |         |                  | Wake Forest University Health Sciences                                              |                                          | Project Manager                                         |                                          | Central Coordinating Center      |
| Brenda                      | Craven            |         |                  | Wake Forest University Health Sciences                                              |                                          | Project Coordinator                                     |                                          | Central Coordinating Center      |
| Candace                     | Goode             |         |                  | Wake Forest University Health Sciences                                              |                                          | Data Coordinator                                        |                                          | Central Coordinating Center      |
| Margie                      | Troxler           |         |                  | Wake Forest University Health Sciences                                              |                                          | Fiscal Coordinator                                      |                                          | Central Coordinating Center      |
| Janet                       | Davis             |         |                  | Wake Forest University Health Sciences                                              |                                          | Administrative Support                                  |                                          | Central Coordinating Center      |
| Sarah                       | Hutchens          |         |                  | Wake Forest University Health Sciences                                              |                                          | Administrative Support                                  |                                          | Central Coordinating Center      |
| Anthony A.                  | Killeen           |         |                  | University of Minnesota                                                             |                                          | Principal Investigator                                  |                                          | Central Laboratory               |
| Anna M.                     | Lukkari           |         |                  | University of Minnesota                                                             |                                          | Coordinator                                             |                                          | Central Laboratory               |
| Robert                      | Ringer            |         |                  | VA Cooperative Studies Program<br>Clinical Research Pharmacy<br>Coordinating Center |                                          | Principal Investigator                                  |                                          | Drug Distribution Center         |
| Brandi                      | Dillard           |         |                  | VA Cooperative Studies Program<br>Clinical Research Pharmacy<br>Coordinating Center |                                          | Coordinator                                             |                                          | Drug Distribution Center         |
| Norbert                     | Archibeque        |         |                  | VA Cooperative Studies Program<br>Clinical Research Pharmacy<br>Coordinating Center |                                          | Coordinator                                             |                                          | Drug Distribution Center         |

## Supplementary Online Content: Nonauthor Collaborators

\*Indicates required information. Only first name, last name, and suffix will appear in PubMed.

| First Name, Middle Initial* | Last Name* | Suffix* | Academic Degrees | Institution                                                                         | Location (city, state/province, country) | Role or Contribution, eg, chair, principal investigator | Group (for manuscripts with more than 1) | Subgroup, eg, Steering Committee |
|-----------------------------|------------|---------|------------------|-------------------------------------------------------------------------------------|------------------------------------------|---------------------------------------------------------|------------------------------------------|----------------------------------|
| Stuart                      | Warren     |         |                  | VA Cooperative Studies Program<br>Clinical Research Pharmacy<br>Coordinating Center |                                          | Co-Investigator                                         |                                          | Drug Distribution Center         |
| Mike                        | Sather     |         |                  | VA Cooperative Studies Program<br>Clinical Research Pharmacy<br>Coordinating Center |                                          | Principal Investigator                                  |                                          | Drug Distribution Center         |
| James                       | Pontzer    |         |                  | VA Cooperative Studies Program<br>Clinical Research Pharmacy<br>Coordinating Center |                                          | Programmer                                              |                                          | Drug Distribution Center         |
| Zach                        | Taylor     |         |                  | VA Cooperative Studies Program<br>Clinical Research Pharmacy<br>Coordinating Center |                                          | Programmer                                              |                                          | Drug Distribution Center         |
| Elsayed Z.                  | Soliman    |         |                  | Epidemiological Cardiology<br>Research Center                                       |                                          | Principal Investigator                                  |                                          | ECG Reading Center               |
| Zhu-Ming                    | Zhang      |         |                  | Epidemiological Cardiology<br>Research Center                                       |                                          | Co-Investigator                                         |                                          | ECG Reading Center               |
| Yabing                      | Li         |         |                  | Epidemiological Cardiology<br>Research Center                                       |                                          | Coordinator                                             |                                          | ECG Reading Center               |
| Chuck                       | Campbell   |         |                  | Epidemiological Cardiology<br>Research Center                                       |                                          | Coordinator                                             |                                          | ECG Reading Center               |
| Susan                       | Hensley    |         |                  | Epidemiological Cardiology<br>Research Center                                       |                                          | Coordinator                                             |                                          | ECG Reading Center               |
| Julie                       | Hu         |         |                  | Epidemiological Cardiology<br>Research Center                                       |                                          | Coordinator                                             |                                          | ECG Reading Center               |
| Lisa                        | Keasler    |         |                  | Epidemiological Cardiology<br>Research Center                                       |                                          | Coordinator                                             |                                          | ECG Reading Center               |
| Mary                        | Barr       |         |                  | Epidemiological Cardiology<br>Research Center                                       |                                          | Coordinator                                             |                                          | ECG Reading Center               |
| Tonya                       | Taylor     |         |                  | Epidemiological Cardiology<br>Research Center                                       |                                          | Coordinator                                             |                                          | ECG Reading Center               |
| Lisa                        | Desiderio  |         |                  | University of Pennsylvania                                                          |                                          | Project Manager                                         |                                          | MRI Reading Center               |
| Mark                        | Elliott    |         |                  | University of Pennsylvania                                                          |                                          | MRI Physicist                                           |                                          | MRI Reading Center               |

## Supplementary Online Content: Nonauthor Collaborators

\*Indicates required information. Only first name, last name, and suffix will appear in PubMed.

| First Name, Middle Initial* | Last Name*     | Suffix* | Academic Degrees | Institution                     | Location (city, state/province, country) | Role or Contribution, eg, chair, principal investigator | Group (for manuscripts with more than 1) | Subgroup, eg, Steering Committee |
|-----------------------------|----------------|---------|------------------|---------------------------------|------------------------------------------|---------------------------------------------------------|------------------------------------------|----------------------------------|
| Ari                         | Borthakur      |         |                  | University of Pennsylvania      |                                          | MRI Physicist                                           |                                          | MRI Reading Center               |
| Harsha                      | Battapady      |         |                  | University of Pennsylvania      |                                          | Data Analyst                                            |                                          | MRI Reading Center               |
| Alex                        | Smith          |         |                  | University of Pennsylvania      |                                          | Postdoctoral Fellow                                     |                                          | MRI Reading Center               |
| Ze                          | Wang           |         |                  | University of Pennsylvania      |                                          | Research Associate                                      |                                          | MRI Reading Center               |
| Jimit                       | Doshi          |         |                  | University of Pennsylvania      |                                          | Data Analyst                                            |                                          | MRI Reading Center               |
| Jackson T.                  | Wright Jr.     |         |                  | Case Western Reserve University |                                          | Principal Investigator                                  |                                          | Clinical Center Network          |
| Mahboob                     | Rahman         |         |                  | Case Western Reserve University |                                          | Co-Principal Investigator                               |                                          | Clinical Center Network          |
| Alan J.                     | Lerner         |         |                  | Case Western Reserve University |                                          | MIND Principal Investigator                             |                                          | Clinical Center Network          |
| Carolyn H.                  | Still          |         |                  | Case Western Reserve University |                                          | Project Manager                                         |                                          | Clinical Center Network          |
| Alan                        | Wiggers        |         |                  | Case Western Reserve University |                                          | Co-Investigator                                         |                                          | Clinical Center Network          |
| Sara                        | Zamanian       |         |                  | Case Western Reserve University |                                          | Co-Investigator                                         |                                          | Clinical Center Network          |
| Alberta                     | Bee            |         |                  | Case Western Reserve University |                                          | Assistant Project Manager                               |                                          | Clinical Center Network          |
| Renee                       | Dancie         |         |                  | Case Western Reserve University |                                          | Project Manager                                         |                                          | Clinical Center Network          |
| George                      | Thomas         |         |                  | Cleveland Clinic Foundation     |                                          | Principal Investigator                                  |                                          | Clinic Site                      |
| Martin                      | Schreiber, Jr. |         |                  | Cleveland Clinic Foundation     |                                          | Co-Investigator                                         |                                          | Clinic Site                      |
| Sankar Dass                 | Navaneethan    |         |                  | Cleveland Clinic Foundation     |                                          | Co-Investigator                                         |                                          | Clinic Site                      |
| John                        | Hickner        |         |                  | Cleveland Clinic Foundation     |                                          | Co-Investigator                                         |                                          | Clinic Site                      |
| Michael                     | Lioudis        |         |                  | Cleveland Clinic Foundation     |                                          | Co-Investigator                                         |                                          | Clinic Site                      |
| Michelle                    | Lard           |         |                  | Cleveland Clinic Foundation     |                                          | Co-Investigator                                         |                                          | Clinic Site                      |
| Susan                       | Marczewski     |         |                  | Cleveland Clinic Foundation     |                                          | Coordinator                                             |                                          | Clinic Site                      |
| Jennifer                    | Maraschky      |         |                  | Cleveland Clinic Foundation     |                                          | Coordinator                                             |                                          | Clinic Site                      |
| Martha                      | Colman         |         |                  | Cleveland Clinic Foundation     |                                          | Coordinator                                             |                                          | Clinic Site                      |
| Andrea                      | Aaby           |         |                  | Cleveland Clinic Foundation     |                                          | Coordinator                                             |                                          | Clinic Site                      |
| Stacey                      | Payne          |         |                  | Cleveland Clinic Foundation     |                                          | Coordinator                                             |                                          | Clinic Site                      |
| Melanie                     | Ramos          |         |                  | Cleveland Clinic Foundation     |                                          | Coordinator                                             |                                          | Clinic Site                      |
| Carol                       | Horner         |         |                  | Cleveland Clinic Foundation     |                                          | Coordinator                                             |                                          | Clinic Site                      |

## Supplementary Online Content: Nonauthor Collaborators

\*Indicates required information. Only first name, last name, and suffix will appear in PubMed.

| First Name, Middle Initial* | Last Name*  | Suffix* | Academic Degrees | Institution                                | Location (city, state/province, country) | Role or Contribution, eg, chair, principal investigator | Group (for manuscripts with more than 1) | Subgroup, eg, Steering Committee |
|-----------------------------|-------------|---------|------------------|--------------------------------------------|------------------------------------------|---------------------------------------------------------|------------------------------------------|----------------------------------|
| Paul E.                     | Drawz       |         |                  | Louis Stokes Cleveland VA Medical Center   |                                          | Co-Investigator                                         |                                          | Clinic Site                      |
| Pratibha P.                 | Raghavendra |         |                  | Louis Stokes Cleveland VA Medical Center   |                                          | Co-Investigator                                         |                                          | Clinic Site                      |
| Scott                       | Ober        |         |                  | Louis Stokes Cleveland VA Medical Center   |                                          | Co-Investigator                                         |                                          | Clinic Site                      |
| Ronda                       | Mourad      |         |                  | Louis Stokes Cleveland VA Medical Center   |                                          | Co-Investigator                                         |                                          | Clinic Site                      |
| Muralidhar                  | Pallaki     |         |                  | Louis Stokes Cleveland VA Medical Center   |                                          | Co-Investigator                                         |                                          | Clinic Site                      |
| Peter                       | Russo       |         |                  | Louis Stokes Cleveland VA Medical Center   |                                          | Co-Investigator                                         |                                          | Clinic Site                      |
| Paul                        | Fantauzzo   |         |                  | Louis Stokes Cleveland VA Medical Center   |                                          | Co-Investigator                                         |                                          | Clinic Site                      |
| Lisa                        | Tucker      |         |                  | Louis Stokes Cleveland VA Medical Center   |                                          | Coordinator                                             |                                          | Clinic Site                      |
| Bill                        | Schwing     |         |                  | Louis Stokes Cleveland VA Medical Center   |                                          | Coordinator                                             |                                          | Clinic Site                      |
| John R.                     | Sedor       |         |                  | MetroHealth Medical Center                 |                                          | Principal Investigator                                  |                                          | Clinic Site                      |
| Edward J.                   | Horwitz     |         |                  | MetroHealth Medical Center                 |                                          | Co-Principal Investigator                               |                                          | Clinic Site                      |
| Jeffrey R.                  | Schelling   |         |                  | MetroHealth Medical Center                 |                                          | Co-Investigator                                         |                                          | Clinic Site                      |
| John F.                     | O'Toole     |         |                  | MetroHealth Medical Center                 |                                          | Co-Investigator                                         |                                          | Clinic Site                      |
| Lisa                        | Humbert     |         |                  | MetroHealth Medical Center                 |                                          | Coordinator                                             |                                          | Clinic Site                      |
| Wendy                       | Tutolo      |         |                  | MetroHealth Medical Center                 |                                          | Coordinator                                             |                                          | Clinic Site                      |
| Suzanne                     | White       |         |                  | North East Ohio Neighbrohood Health Center |                                          | Principal Investigator                                  |                                          | Clinic Site                      |
| Alishea                     | Gay         |         |                  | North East Ohio Neighbrohood Health Center |                                          | Co-Investigator                                         |                                          | Clinic Site                      |
| Walter                      | Clark, Jr   |         |                  | North East Ohio Neighbrohood Health Center |                                          | former Principal Investigator                           |                                          | Clinic Site                      |
| Robin                       | Hughes      |         |                  | North East Ohio Neighbrohood Health Center |                                          | Coordinator                                             |                                          | Clinic Site                      |
| Mirela                      | Dobre       |         |                  | University Hospital Case Medical Center    |                                          | Principal Investigator                                  |                                          | Clinic Site                      |

## Supplementary Online Content: Nonauthor Collaborators

\*Indicates required information. Only first name, last name, and suffix will appear in PubMed.

| First Name, Middle Initial* | Last Name*    | Suffix* | Academic Degrees | Institution                              | Location (city, state/province, country) | Role or Contribution, eg, chair, principal investigator | Group (for manuscripts with more than 1) | Subgroup, eg, Steering Committee |
|-----------------------------|---------------|---------|------------------|------------------------------------------|------------------------------------------|---------------------------------------------------------|------------------------------------------|----------------------------------|
| Monique                     | Williams      |         |                  | University Hospital Case Medical Center  |                                          | Coordinator                                             |                                          | Clinic Site                      |
| Udayan                      | Bhatt         |         |                  | The Ohio State University Medical Center |                                          | Principal Investigator                                  |                                          | Clinic Site                      |
| Lee                         | Hebert        |         |                  | The Ohio State University Medical Center |                                          | former Principal Investigator                           |                                          | Clinic Site                      |
| Anil                        | Agarwal       |         |                  | The Ohio State University Medical Center |                                          | Co-Principal Investigator                               |                                          | Clinic Site                      |
| Melissa                     | Brown Murphy  |         |                  | The Ohio State University Medical Center |                                          | Coordinator                                             |                                          | Clinic Site                      |
| Nicole                      | Ford          |         |                  | The Ohio State University Medical Center |                                          | Coordinator                                             |                                          | Clinic Site                      |
| Cynthia                     | Stratton      |         |                  | The Ohio State University Medical Center |                                          | Coordinator                                             |                                          | Clinic Site                      |
| Jody                        | Baxter        |         |                  | The Ohio State University Medical Center |                                          | Coordinator                                             |                                          | Clinic Site                      |
| Alicia A.                   | Lykins        |         |                  | The Ohio State University Medical Center |                                          | Coordinator                                             |                                          | Clinic Site                      |
| Alison                      | McKinley Neal |         |                  | The Ohio State University Medical Center |                                          | Coordinator                                             |                                          | Clinic Site                      |
| Leena                       | Hirmath       |         |                  | The Ohio State University Medical Center |                                          | Coordinator                                             |                                          | Clinic Site                      |
| Osei                        | Kwame         |         |                  | The Ohio State University Medical Center |                                          | Principal Investigator                                  |                                          | Clinic Site                      |
| Kyaw                        | Soe           |         |                  | The Ohio State University Medical Center |                                          | Co-Investigator                                         |                                          | Clinic Site                      |
| William F.                  | Miser         |         |                  | The Ohio State University Medical Center |                                          | Co-Principal Investigator                               |                                          | Clinic Site                      |
| Colleen                     | Sagrilla      |         |                  | The Ohio State University Medical Center |                                          | Coordinator                                             |                                          | Clinic Site                      |
| Jan                         | Johnston      |         |                  | The Ohio State University Medical Center |                                          | Coordinator                                             |                                          | Clinic Site                      |
| Amber                       | Anaya         |         |                  | The Ohio State University Medical Center |                                          | Coordinator                                             |                                          | Clinic Site                      |
| Ashley                      | Mintos        |         |                  | The Ohio State University Medical Center |                                          | Coordinator                                             |                                          | Clinic Site                      |



## Supplementary Online Content: Nonauthor Collaborators

\*Indicates required information. Only first name, last name, and suffix will appear in PubMed.

| First Name, Middle Initial* | Last Name*  | Suffix* | Academic Degrees | Institution                                      | Location (city, state/province, country) | Role or Contribution, eg, chair, principal investigator | Group (for manuscripts with more than 1) | Subgroup, eg, Steering Committee |
|-----------------------------|-------------|---------|------------------|--------------------------------------------------|------------------------------------------|---------------------------------------------------------|------------------------------------------|----------------------------------|
| Angel A.                    | Howell      |         |                  | The Ohio State University Medical Center         |                                          | Coordinator                                             |                                          | Clinic Site                      |
| Kelly                       | Rogers      |         |                  | The Ohio State University Medical Center         |                                          | Coordinator                                             |                                          | Clinic Site                      |
| Sara                        | Taylor      |         |                  | The Ohio State University Medical Center         |                                          | Co-Investigator                                         |                                          | Clinic Site                      |
| Donald                      | Ebersbacher |         |                  | University Hospitals Landerbrook Health Center   |                                          | Principal Investigator                                  |                                          | Clinic Site                      |
| Lucy                        | Long        |         |                  | University Hospitals Landerbrook Health Center   |                                          | Coordinator                                             |                                          | Clinic Site                      |
| Beth                        | Bednarchik  |         |                  | University Hospitals Landerbrook Health Center   |                                          | Coordinator                                             |                                          | Clinic Site                      |
| Adrian                      | Schnall     |         |                  | University Hospitals Suburban Health             |                                          | Principal Investigator                                  |                                          | Clinic Site                      |
| Jonathan                    | Smith       |         |                  | University Hospitals Suburban Health             |                                          | Coordinator                                             |                                          | Clinic Site                      |
| Lori                        | Peysa       |         |                  | University Hospitals Suburban Health             |                                          | Coordinator                                             |                                          | Clinic Site                      |
| Lisa                        | Leach       |         |                  | University Hospitals Suburban Health             |                                          | Coordinator                                             |                                          | Clinic Site                      |
| Megan                       | Tribout     |         |                  | University Hospitals Suburban Health             |                                          | Coordinator                                             |                                          | Clinic Site                      |
| Carla                       | Harwell     |         |                  | University Hospitals Otis Moss Jr. Health Center |                                          | Principal Investigator                                  |                                          | Clinic Site                      |
| Pinkie                      | Ellington   |         |                  | University Hospitals Otis Moss Jr. Health Center |                                          | Coordinator                                             |                                          | Clinic Site                      |
| Mary Ann                    | Banerji     |         |                  | SUNY Downstate Medical Center                    |                                          | Principal Investigator                                  |                                          | Clinic Site                      |
| Pranav                      | Ghody       |         |                  | SUNY Downstate Medical Center                    |                                          | Co-Investigator                                         |                                          | Clinic Site                      |
| Melissa Vahided             | Rambaud     |         |                  | SUNY Downstate Medical Center                    |                                          | Coordinator                                             |                                          | Clinic Site                      |
| Raymond                     | Townsend    |         |                  | University of Pennsylvania                       |                                          | Principal Investigator                                  |                                          | Clinic Site                      |
| Debbie                      | Cohen       |         |                  | University of Pennsylvania                       |                                          | Co-Investigator                                         |                                          | Clinic Site                      |
| Yonghong                    | Huan        |         |                  | University of Pennsylvania                       |                                          | Co-Investigator                                         |                                          | Clinic Site                      |

## Supplementary Online Content: Nonauthor Collaborators

\*Indicates required information. Only first name, last name, and suffix will appear in PubMed.

| First Name, Middle Initial* | Last Name*   | Suffix* | Academic Degrees | Institution                            | Location (city, state/province, country) | Role or Contribution, eg, chair, principal investigator | Group (for manuscripts with more than 1) | Subgroup, eg, Steering Committee |
|-----------------------------|--------------|---------|------------------|----------------------------------------|------------------------------------------|---------------------------------------------------------|------------------------------------------|----------------------------------|
| Mark                        | Duckworth    |         |                  | University of Pennsylvania             |                                          | Coordinator                                             |                                          | Clinic Site                      |
| Virginia                    | Ford         |         |                  | University of Pennsylvania             |                                          | Coordinator                                             |                                          | Clinic Site                      |
| Juliet                      | Leshner      |         |                  | University of Pennsylvania             |                                          | Coordinator                                             |                                          | Clinic Site                      |
| Ann                         | Davison      |         |                  | University of Pennsylvania             |                                          | Coordinator                                             |                                          | Clinic Site                      |
| Sarah                       | Vander Veen  |         |                  | University of Pennsylvania             |                                          | Coordinator                                             |                                          | Clinic Site                      |
| Crystal A.                  | Gadegbeku    |         |                  | Temple University                      |                                          | Principal Investigator                                  |                                          | Clinic Site                      |
| Avi                         | Gillespie    |         |                  | Temple University                      |                                          | Co-Investigator                                         |                                          | Clinic Site                      |
| Anuradha                    | Paranje      |         |                  | Temple University                      |                                          | Co-Investigator                                         |                                          | Clinic Site                      |
| Sandra                      | Amoroso      |         |                  | Temple University                      |                                          | Coordinator                                             |                                          | Clinic Site                      |
| Zoe                         | Pfeffer      |         |                  | Temple University                      |                                          | Coordinator                                             |                                          | Clinic Site                      |
| Sally B.                    | Quinn        |         |                  | Temple University                      |                                          | Coordinator                                             |                                          | Clinic Site                      |
| Jiang                       | He           |         |                  | Tulane University                      |                                          | Principal Investigator                                  |                                          | Clinic Site                      |
| Jing                        | Chen         |         |                  | Tulane University                      |                                          | Co-Investigator                                         |                                          | Clinic Site                      |
| Eva                         | Lustigova    |         |                  | Tulane University                      |                                          | Coordinator                                             |                                          | Clinic Site                      |
| Erin                        | Malone       |         |                  | Tulane University                      |                                          | Coordinator                                             |                                          | Clinic Site                      |
| Marie                       | Krousel-Wood |         |                  | Ochsner Clinic Foundation              |                                          | Principal Investigator                                  |                                          | Clinic Site                      |
| Richard                     | Deichmann    |         |                  | Ochsner Clinic Foundation              |                                          | Co-Investigator                                         |                                          | Clinic Site                      |
| Patricia                    | Ronney       |         |                  | Ochsner Clinic Foundation              |                                          | Co-Investigator                                         |                                          | Clinic Site                      |
| Susan                       | Muery        |         |                  | Ochsner Clinic Foundation              |                                          | Coordinator                                             |                                          | Clinic Site                      |
| Donnalee                    | Trapani      |         |                  | Ochsner Clinic Foundation              |                                          | Coordinator                                             |                                          | Clinic Site                      |
| Michael                     | Rocco        |         |                  | Wake Forest University Health Sciences |                                          | Principal Investigator                                  |                                          | Clinical Center Network          |
| David                       | Goff         |         |                  | Wake Forest University Health Sciences |                                          | former Principal Investigator                           |                                          | Clinical Center Network          |
| Carlos                      | Rodriguez    |         |                  | Wake Forest University Health Sciences |                                          | Co-Investigator                                         |                                          | Clinical Center Network          |
| Laura                       | Coker        |         |                  | Wake Forest University Health Sciences |                                          | Co-Investigator                                         |                                          | Clinical Center Network          |
| Amret                       | Hawfield     |         |                  | Wake Forest University Health Sciences |                                          | Co-Investigator                                         |                                          | Clinical Center Network          |
| Joseph                      | Yeboah       |         |                  | Wake Forest University Health Sciences |                                          | Co-Investigator                                         |                                          | Clinical Center Network          |

## Supplementary Online Content: Nonauthor Collaborators

\*Indicates required information. Only first name, last name, and suffix will appear in PubMed.

| First Name, Middle Initial* | Last Name* | Suffix* | Academic Degrees | Institution                            | Location (city, state/province, country) | Role or Contribution, eg, chair, principal investigator | Group (for manuscripts with more than 1) | Subgroup, eg, Steering Committee |
|-----------------------------|------------|---------|------------------|----------------------------------------|------------------------------------------|---------------------------------------------------------|------------------------------------------|----------------------------------|
| Lenore                      | Crago      |         |                  | Wake Forest University Health Sciences |                                          | Coordinator                                             |                                          | Clinical Center Network          |
| John                        | Summerson  |         |                  | Wake Forest University Health Sciences |                                          | Coordinator                                             |                                          | Clinical Center Network          |
| Anita                       | Hege       |         |                  | Wake Forest University Health Sciences |                                          | Coordinator                                             |                                          | Clinical Center Network          |
| Matt                        | Diamond    |         |                  | Georgia Regents University             |                                          | Principal Investigator                                  |                                          | Clinic Site                      |
| Laura                       | Mulloy     |         |                  | Georgia Regents University             |                                          | Principal Investigator                                  |                                          | Clinic Site                      |
| Marcela                     | Hodges     |         |                  | Georgia Regents University             |                                          | Coordinator                                             |                                          | Clinic Site                      |
| Michelle                    | Collins    |         |                  | Georgia Regents University             |                                          | Coordinator                                             |                                          | Clinic Site                      |
| Charlene                    | Weathers   |         |                  | Georgia Regents University             |                                          | Coordinator                                             |                                          | Clinic Site                      |
| Heather                     | Anderson   |         |                  | Georgia Regents University             |                                          | Coordinator                                             |                                          | Clinic Site                      |
| Emily                       | Stone      |         |                  | Georgia Regents University             |                                          | Coordinator                                             |                                          | Clinic Site                      |
| Walida                      | Walker     |         |                  | Georgia Regents University             |                                          | Coordinator                                             |                                          | Clinic Site                      |
| Andrew                      | McWilliams |         |                  | Carolinas Medical Center               |                                          | Principal Investigator                                  |                                          | Clinic Site                      |
| Michael                     | Dulin      |         |                  | Carolinas Medical Center               |                                          | Co-Investigator                                         |                                          | Clinic Site                      |
| Lindsay                     | Kuhn       |         |                  | Carolinas Medical Center               |                                          | Co-Principal Investigator                               |                                          | Clinic Site                      |
| Susan                       | Standridge |         |                  | Carolinas Medical Center               |                                          | Coordinator                                             |                                          | Clinic Site                      |
| Lindsay                     | Lowe       |         |                  | Carolinas Medical Center               |                                          | Coordinator                                             |                                          | Clinic Site                      |
| Kelly                       | Everett    |         |                  | Carolinas Medical Center               |                                          | Coordinator                                             |                                          | Clinic Site                      |
| Kelry                       | Preston    |         |                  | Carolinas Medical Center               |                                          | Coordinator                                             |                                          | Clinic Site                      |
| Susan                       | Norton     |         |                  | Carolinas Medical Center               |                                          | Coordinator                                             |                                          | Clinic Site                      |
| Silena                      | Gaines     |         |                  | Carolinas Medical Center               |                                          | Coordinator                                             |                                          | Clinic Site                      |
| Ali A.                      | Rizvi      |         |                  | University of South Carolina           |                                          | Principal Investigator                                  |                                          | Clinic Site                      |
| Andrew W.                   | Sides      |         |                  | University of South Carolina           |                                          | Co-Principal Investigator                               |                                          | Clinic Site                      |
| Diamond                     | Herbert    |         |                  | University of South Carolina           |                                          | Coordinator                                             |                                          | Clinic Site                      |
| Matthew M.                  | Hix        |         |                  | University of South Carolina           |                                          | Coordinator                                             |                                          | Clinic Site                      |
| Melanie                     | Whitmire   |         |                  | University of South Carolina           |                                          | Coordinator                                             |                                          | Clinic Site                      |
| Brittany                    | Arnold     |         |                  | University of South Carolina           |                                          | Coordinator                                             |                                          | Clinic Site                      |
| Philip                      | Hutchinson |         |                  | University of South Carolina           |                                          | Coordinator                                             |                                          | Clinic Site                      |

## Supplementary Online Content: Nonauthor Collaborators

\*Indicates required information. Only first name, last name, and suffix will appear in PubMed.

| First Name, Middle Initial* | Last Name*     | Suffix* | Academic Degrees | Institution                  | Location (city, state/province, country) | Role or Contribution, eg, chair, principal investigator | Group (for manuscripts with more than 1) | Subgroup, eg, Steering Committee |
|-----------------------------|----------------|---------|------------------|------------------------------|------------------------------------------|---------------------------------------------------------|------------------------------------------|----------------------------------|
| Joseph                      | Espiritu       |         |                  | University of South Carolina |                                          | Coordinator                                             |                                          | Clinic Site                      |
| Mark                        | Feinglos       |         |                  | Duke University              |                                          | Principal Investigator                                  |                                          | Clinic Site                      |
| Eugene                      | Kovalik        |         |                  | Duke University              |                                          | Co-Principal Investigator                               |                                          | Clinic Site                      |
| Georgianne                  | Gedon-Lipscomb |         |                  | Duke University              |                                          | Coordinator                                             |                                          | Clinic Site                      |
| Kathryn                     | Evans          |         |                  | Duke University              |                                          | Coordinator                                             |                                          | Clinic Site                      |
| Connie                      | Thacker        |         |                  | Duke University              |                                          | Coordinator                                             |                                          | Clinic Site                      |
| Ronna                       | Zimmer         |         |                  | Duke University              |                                          | Coordinator                                             |                                          | Clinic Site                      |
| Mary                        | Furst          |         |                  | Duke University              |                                          | Coordinator                                             |                                          | Clinic Site                      |
| MaryAnn                     | Mason          |         |                  | Duke University              |                                          | Coordinator                                             |                                          | Clinic Site                      |
| James                       | Powell         |         |                  | East Carolina University     |                                          | Principal Investigator                                  |                                          | Clinic Site                      |
| Paul                        | Bolin          |         |                  | East Carolina University     |                                          | Co-Principal Investigator                               |                                          | Clinic Site                      |
| Junhong                     | Zhang          |         |                  | East Carolina University     |                                          | Co-Principal Investigator                               |                                          | Clinic Site                      |
| Mary                        | Pinion         |         |                  | East Carolina University     |                                          | Coordinator                                             |                                          | Clinic Site                      |
| Gail                        | Davis          |         |                  | East Carolina University     |                                          | Coordinator                                             |                                          | Clinic Site                      |
| Winifred                    | Bryant         |         |                  | East Carolina University     |                                          | Coordinator                                             |                                          | Clinic Site                      |
| Presley                     | Phelps         |         |                  | East Carolina University     |                                          | Coordinator                                             |                                          | Clinic Site                      |
| Connie                      | Garris-Sutton  |         |                  | East Carolina University     |                                          | Coordinator                                             |                                          | Clinic Site                      |
| Beatrice                    | Atkinson       |         |                  | East Carolina University     |                                          | Coordinator                                             |                                          | Clinic Site                      |
| Gabriele                    | Contreras      |         |                  | University of Miami          |                                          | Principal Investigator                                  |                                          | Clinic Site                      |
| Maritza                     | Suarez         |         |                  | University of Miami          |                                          | Co-Principal Investigator                               |                                          | Clinic Site                      |
| Ivonne                      | Schulman       |         |                  | University of Miami          |                                          | Co-Principal Investigator                               |                                          | Clinic Site                      |
| Don                         | Koggan         |         |                  | University of Miami          |                                          | Coordinator                                             |                                          | Clinic Site                      |
| Jackie                      | Vassallo       |         |                  | University of Miami          |                                          | Coordinator                                             |                                          | Clinic Site                      |
| Gloria                      | Peruyera       |         |                  | University of Miami          |                                          | Coordinator                                             |                                          | Clinic Site                      |
| Sheri                       | Whittington    |         |                  | Wake Forest Nephrology       |                                          | Coordinator                                             |                                          | Clinic Site                      |
| Cassandra                   | Bethea         |         |                  | Wake Forest Nephrology       |                                          | Coordinator                                             |                                          | Clinic Site                      |
| Laura                       | Gilliam        |         |                  | Wake Forest Nephrology       |                                          | Coordinator                                             |                                          | Clinic Site                      |

## Supplementary Online Content: Nonauthor Collaborators

\*Indicates required information. Only first name, last name, and suffix will appear in PubMed.

| First Name, Middle Initial* | Last Name*     | Suffix* | Academic Degrees | Institution                       | Location (city, state/province, country) | Role or Contribution, eg, chair, principal investigator | Group (for manuscripts with more than 1) | Subgroup, eg, Steering Committee |
|-----------------------------|----------------|---------|------------------|-----------------------------------|------------------------------------------|---------------------------------------------------------|------------------------------------------|----------------------------------|
| Carolyn                     | Pedley         |         |                  | Wake Forest Downtown Health Plaza |                                          | Principal Investigator                                  |                                          | Clinic Site                      |
| Geraldine                   | Zurek          |         |                  | Wake Forest Downtown Health Plaza |                                          | Coordinator                                             |                                          | Clinic Site                      |
| Miriam                      | Baird          |         |                  | Wake Forest Downtown Health Plaza |                                          | Coordinator                                             |                                          | Clinic Site                      |
| Charles                     | Herring        |         |                  | Wake Forest Downtown Health Plaza |                                          | PharmD                                                  |                                          | Clinic Site                      |
| Mary Martha                 | Smoak          |         |                  | Wake Forest Downtown Health Plaza |                                          | Coordinator                                             |                                          | Clinic Site                      |
| Julie                       | Williams       |         |                  | Wake Forest Geriatrics            |                                          | Principal Investigator                                  |                                          | Clinic Site                      |
| Samantha                    | Rogers         |         |                  | Wake Forest Geriatrics            |                                          | Co-Principal Investigator                               |                                          | Clinic Site                      |
| Lindsay                     | Gordon         |         |                  | Wake Forest Geriatrics            |                                          | Coordinator                                             |                                          | Clinic Site                      |
| Erin                        | Kennedy        |         |                  | Wake Forest Geriatrics            |                                          | Coordinator                                             |                                          | Clinic Site                      |
| Beverly                     | Belle          |         |                  | Wake Forest Geriatrics            |                                          | Coordinator                                             |                                          | Clinic Site                      |
| Jessica                     | McCorkle-Doomy |         |                  | Wake Forest Geriatrics            |                                          | Coordinator                                             |                                          | Clinic Site                      |
| Jonathan                    | Adams          |         |                  | Wake Forest Geriatrics            |                                          | Coordinator                                             |                                          | Clinic Site                      |
| Ramon                       | Lopez          |         |                  | University of South Florida       |                                          | Principal Investigator                                  |                                          | Clinic Site                      |
| Juris                       | Jamavs         |         |                  | University of South Florida       |                                          | Coordinator                                             |                                          | Clinic Site                      |
| Frederic                    | Rahbari-Oskoui |         |                  | Emory University                  |                                          | Principal Investigator                                  |                                          | Clinic Site                      |
| Arlene                      | Chapman        |         |                  | Emory University                  |                                          | former Principal Investigator                           |                                          | Clinic Site                      |
| Allen                       | Dollar         |         |                  | Emory University                  |                                          | Co-Principal Investigator                               |                                          | Clinic Site                      |
| Olubunmi                    | Williams       |         |                  | Emory University                  |                                          | Coordinator                                             |                                          | Clinic Site                      |
| Yoosun                      | Han            |         |                  | Emory University                  |                                          | Coordinator                                             |                                          | Clinic Site                      |
| William                     | Haley          |         |                  | The Mayo Clinic Jacksonville      |                                          | Principal Investigator                                  |                                          | Clinic Site                      |
| Peter                       | Fitzpatrick    |         |                  | The Mayo Clinic Jacksonville      |                                          | Co-Principal Investigator                               |                                          | Clinic Site                      |

## Supplementary Online Content: Nonauthor Collaborators

\*Indicates required information. Only first name, last name, and suffix will appear in PubMed.

| First Name, Middle Initial* | Last Name*     | Suffix* | Academic Degrees | Institution                    | Location (city, state/province, country) | Role or Contribution, eg, chair, principal investigator | Group (for manuscripts with more than 1) | Subgroup, eg, Steering Committee |
|-----------------------------|----------------|---------|------------------|--------------------------------|------------------------------------------|---------------------------------------------------------|------------------------------------------|----------------------------------|
| Joseph                      | Blackshear     |         |                  | The Mayo Clinic Jacksonville   |                                          | Co-Principal Investigator                               |                                          | Clinic Site                      |
| Brian                       | Shapiro        |         |                  | The Mayo Clinic Jacksonville   |                                          | Co-Principal Investigator                               |                                          | Clinic Site                      |
| Anna                        | Harrell        |         |                  | The Mayo Clinic Jacksonville   |                                          | Coordinator                                             |                                          | Clinic Site                      |
| Arta                        | Palaj          |         |                  | The Mayo Clinic Jacksonville   |                                          | Coordinator                                             |                                          | Clinic Site                      |
| Katelyn                     | Henderson      |         |                  | The Mayo Clinic Jacksonville   |                                          | Coordinator                                             |                                          | Clinic Site                      |
| Ashley                      | Johnson        |         |                  | The Mayo Clinic Jacksonville   |                                          | Coordinator                                             |                                          | Clinic Site                      |
| Heath                       | Gonzalez       |         |                  | The Mayo Clinic Jacksonville   |                                          | Coordinator                                             |                                          | Clinic Site                      |
| Jermaine                    | Robinson       |         |                  | The Mayo Clinic Jacksonville   |                                          | Coordinator                                             |                                          | Clinic Site                      |
| Leonardo                    | Tamariz        |         |                  | Miami VA                       |                                          | Principal Investigator                                  |                                          | Clinic Site                      |
| Dhurga                      | Krishnamoorthy |         |                  | Miami VA                       |                                          | Coordinator                                             |                                          | Clinic Site                      |
| Rody                        | Barakat        |         |                  | Miami VA                       |                                          | Coordinator                                             |                                          |                                  |
| Jennifer                    | Denizard       |         |                  | Miami VA                       |                                          | Coordinator                                             |                                          | Clinic Site                      |
| Frank                       | Greenway       |         |                  | Pennington Biomedical Research |                                          | Principal Investigator                                  |                                          | Clinic Site                      |
| Ron                         | Monce          |         |                  | Pennington Biomedical Research |                                          | Co-Investigator                                         |                                          | Clinic Site                      |
| Timothy                     | Church         |         |                  | Pennington Biomedical Research |                                          | former Principal Investigator                           |                                          | Clinic Site                      |
| Chelsea                     | Hendrick       |         |                  | Pennington Biomedical Research |                                          | Coordinator                                             |                                          | Clinic Site                      |
| Aimee                       | Yoches         |         |                  | Pennington Biomedical Research |                                          | Coordinator                                             |                                          | Clinic Site                      |
| Leighanne                   | Sones          |         |                  | Pennington Biomedical Research |                                          | Coordinator                                             |                                          | Clinic Site                      |
| Markee                      | Baltazar       |         |                  | Pennington Biomedical Research |                                          | Coordinator                                             |                                          | Clinic Site                      |
| Priscilla                   | Pemu           |         |                  | Morehouse School of Medicine   |                                          | Principal Investigator                                  |                                          | Clinic Site                      |
| Connie                      | Jones          |         |                  | Morehouse School of Medicine   |                                          | Coordinator                                             |                                          | Clinic Site                      |
| Derrick                     | Akpalu         |         |                  | Morehouse School of Medicine   |                                          | Coordinator                                             |                                          | Clinic Site                      |

## Supplementary Online Content: Nonauthor Collaborators

\*Indicates required information. Only first name, last name, and suffix will appear in PubMed.

| First Name, Middle Initial* | Last Name* | Suffix* | Academic Degrees | Institution                      | Location (city, state/province, country) | Role or Contribution, eg, chair, principal investigator | Group (for manuscripts with more than 1) | Subgroup, eg, Steering Committee |
|-----------------------------|------------|---------|------------------|----------------------------------|------------------------------------------|---------------------------------------------------------|------------------------------------------|----------------------------------|
| Alfred K.                   | Cheung     |         |                  | University of Utah               |                                          | Principal Investigator                                  |                                          | Clinical Center Network          |
| Srinivasan                  | Beddhu     |         |                  | University of Utah               |                                          | Co-Investigator                                         |                                          | Clinical Center Network          |
| Gordon                      | Chelune    |         |                  | University of Utah               |                                          | MIND Principal Investigator                             |                                          | Clinical Center Network          |
| Jeffrey                     | Childs     |         |                  | University of Utah               |                                          | Associate Director of Operations                        |                                          | Clinical Center Network          |
| Lisa                        | Gren       |         |                  | University of Utah               |                                          | Director of Operations                                  |                                          | Clinical Center Network          |
| Anne                        | Randall    |         |                  | University of Utah               |                                          | Coordinator                                             |                                          | Clinical Center Network          |
| Laura                       | Dember     |         |                  | Boston University Medical Center |                                          | Principal Investigator                                  |                                          | Clinic Site                      |
| Denise                      | Soares     |         |                  | Boston University Medical Center |                                          | Coordinator                                             |                                          | Clinic Site                      |
| Jerry                       | Yee        |         |                  | Henry Ford Hospital              |                                          | Principal Investigator                                  |                                          | Clinic Site                      |
| Kausik                      | Umanath    |         |                  | Henry Ford Hospital              |                                          | Co-Principal Investigator                               |                                          | Clinic Site                      |
| Naima                       | Ogletree   |         |                  | Henry Ford Hospital              |                                          | Co-Investigator                                         |                                          | Clinic Site                      |
| Schwana                     | Thaxton    |         |                  | Henry Ford Hospital              |                                          | Co-Investigator                                         |                                          | Clinic Site                      |
| Karen                       | Camapana   |         |                  | Henry Ford Hospital              |                                          | Coordinator                                             |                                          | Clinic Site                      |
| Dayna                       | Sheldon    |         |                  | Henry Ford Hospital              |                                          | Coordinator                                             |                                          | Clinic Site                      |
| Krista                      | MacArthur  |         |                  | Henry Ford Hospital              |                                          | Coordinator                                             |                                          | Clinic Site                      |
| J. Brent                    | Muhlestein |         |                  | Intermountain Health Care        |                                          | Principal Investigator                                  |                                          | Clinic Site                      |
| Nathan                      | Allred     |         |                  | Intermountain Health Care        |                                          | Co-Investigator                                         |                                          | Clinic Site                      |
| Brian                       | Clements   |         |                  | Intermountain Health Care        |                                          | Co-Investigator                                         |                                          | Clinic Site                      |
| Ritesh                      | Dhar       |         |                  | Intermountain Health Care        |                                          | Co-Investigator                                         |                                          | Clinic Site                      |
| Kent                        | Meredith   |         |                  | Intermountain Health Care        |                                          | Co-Investigator                                         |                                          | Clinic Site                      |
| Viet                        | Le         |         |                  | Intermountain Health Care        |                                          | Co-Investigator                                         |                                          | Clinic Site                      |
| Edward                      | Miner      |         |                  | Intermountain Health Care        |                                          | Co-Investigator                                         |                                          | Clinic Site                      |
| James                       | Orford     |         |                  | Intermountain Health Care        |                                          | Co-Investigator                                         |                                          | Clinic Site                      |
| Erik R.                     | Riessen    |         |                  | Intermountain Health Care        |                                          | Co-Investigator                                         |                                          | Clinic Site                      |
| Becca                       | Ballantyne |         |                  | Intermountain Health Care        |                                          | Coordinator                                             |                                          | Clinic Site                      |

## Supplementary Online Content: Nonauthor Collaborators

\*Indicates required information. Only first name, last name, and suffix will appear in PubMed.

| First Name, Middle Initial* | Last Name*  | Suffix* | Academic Degrees | Institution                    | Location (city, state/province, country) | Role or Contribution, eg, chair, principal investigator | Group (for manuscripts with more than 1) | Subgroup, eg, Steering Committee |
|-----------------------------|-------------|---------|------------------|--------------------------------|------------------------------------------|---------------------------------------------------------|------------------------------------------|----------------------------------|
| Ben                         | Chisum      |         |                  | Intermountain Health Care      |                                          | Coordinator                                             |                                          | Clinic Site                      |
| Kevin                       | Johnson     |         |                  | Intermountain Health Care      |                                          | Coordinator                                             |                                          | Clinic Site                      |
| Dixie                       | Peeler      |         |                  | Intermountain Health Care      |                                          | Coordinator                                             |                                          | Clinic Site                      |
| Glenn                       | Chertow     |         |                  | Stanford University            |                                          | Principal Investigator                                  |                                          | Clinic Site                      |
| Manju                       | Tamura      |         |                  | Stanford University            |                                          | Co-Principal Investigator                               |                                          | Clinic Site                      |
| Tara                        | Chang       |         |                  | Stanford University            |                                          | Co-Investigator                                         |                                          | Clinic Site                      |
| Kevin                       | Erickson    |         |                  | Stanford University            |                                          | Co-Investigator                                         |                                          | Clinic Site                      |
| Jenny                       | Shen        |         |                  | Stanford University            |                                          | Co-Investigator                                         |                                          | Clinic Site                      |
| Randall S.                  | Stafford    |         |                  | Stanford University            |                                          | Co-Investigator                                         |                                          | Clinic Site                      |
| Gregory                     | Zaharchuk   |         |                  | Stanford University            |                                          | Co-Investigator                                         |                                          | Clinic Site                      |
| Margareth                   | Del Cid     |         |                  | Stanford University            |                                          | Coordinator                                             |                                          | Clinic Site                      |
| Michelle                    | Dentinger   |         |                  | Stanford University            |                                          | Coordinator                                             |                                          | Clinic Site                      |
| Jennifer                    | Sabino      |         |                  | Stanford University            |                                          | Coordinator                                             |                                          | Clinic Site                      |
| Rukmani                     | Sahay       |         |                  | Stanford University            |                                          | Coordinator                                             |                                          | Clinic Site                      |
| Ekaterina                   | Telminova   |         |                  | Stanford University            |                                          | Coordinator                                             |                                          | Clinic Site                      |
| Daniel E.                   | Weiner      |         |                  | Tufts Medical Center           |                                          | Principal Investigator                                  |                                          | Clinic Site                      |
| Mark                        | Sarnak      |         |                  | Tufts Medical Center           |                                          | Co-Investigator                                         |                                          | Clinic Site                      |
| Lily                        | Chan        |         |                  | Tufts Medical Center           |                                          | Coordinator                                             |                                          | Clinic Site                      |
| Amanda                      | Civiletto   |         |                  | Tufts Medical Center           |                                          | Coordinator                                             |                                          | Clinic Site                      |
| Alyson                      | Heath       |         |                  | Tufts Medical Center           |                                          | Coordinator                                             |                                          | Clinic Site                      |
| Amy                         | Kantor      |         |                  | Tufts Medical Center           |                                          | Coordinator                                             |                                          | Clinic Site                      |
| Priyanka                    | Jain        |         |                  | Tufts Medical Center           |                                          | Coordinator                                             |                                          | Clinic Site                      |
| Bethany                     | Kirkpatrick |         |                  | Tufts Medical Center           |                                          | Coordinator                                             |                                          | Clinic Site                      |
| Andrew                      | Well        |         |                  | Tufts Medical Center           |                                          | Coordinator                                             |                                          | Clinic Site                      |
| Barry                       | Yuen        |         |                  | Tufts Medical Center           |                                          | Coordinator                                             |                                          | Clinic Site                      |
| Michel                      | Choncol     |         |                  | University of Colorado         |                                          | Principal Investigator                                  |                                          | Clinic Site                      |
| Beverly                     | Farmer      |         |                  | University of Colorado         |                                          | Coordinator                                             |                                          | Clinic Site                      |
| Heather                     | Farmer      |         |                  | University of Colorado         |                                          | Coordinator                                             |                                          | Clinic Site                      |
| Carol                       | Greenwald   |         |                  | University of Colorado         |                                          | Coordinator                                             |                                          | Clinic Site                      |
| Mikaela                     | Malaczewski |         |                  | University of Colorado         |                                          | Coordinator                                             |                                          | Clinic Site                      |
| James                       | Lash        |         |                  | University of Illinois-Chicago |                                          | Principal Investigator                                  |                                          | Clinic Site                      |



## Supplementary Online Content: Nonauthor Collaborators

\*Indicates required information. Only first name, last name, and suffix will appear in PubMed.

| First Name, Middle Initial* | Last Name*    | Suffix* | Academic Degrees | Institution                      | Location (city, state/province, country) | Role or Contribution, eg, chair, principal investigator | Group (for manuscripts with more than 1) | Subgroup, eg, Steering Committee |
|-----------------------------|---------------|---------|------------------|----------------------------------|------------------------------------------|---------------------------------------------------------|------------------------------------------|----------------------------------|
| Anna                        | Porter        |         |                  | University of Illinois-Chicago   |                                          | Co-Investigator                                         |                                          | Clinic Site                      |
| Ana                         | Ricardo       |         |                  | University of Illinois-Chicago   |                                          | Co-Investigator                                         |                                          | Clinic Site                      |
| Robert T.                   | Rosman        |         |                  | University of Illinois-Chicago   |                                          | Co-Investigator                                         |                                          | Clinic Site                      |
| Janet                       | Cohan         |         |                  | University of Illinois-Chicago   |                                          | Coordinator                                             |                                          | Clinic Site                      |
| Nieves                      | Lopez-Barrera |         |                  | University of Illinois-Chicago   |                                          | Coordinator                                             |                                          | Clinic Site                      |
| Daniel                      | Meslar        |         |                  | University of Illinois-Chicago   |                                          | Coordinator                                             |                                          | Clinic Site                      |
| Patricia                    | Meslar        |         |                  | University of Illinois-Chicago   |                                          | Coordinator                                             |                                          | Clinic Site                      |
| Margaret                    | Conroy        |         |                  | University of Pittsburgh         |                                          | Principal Investigator                                  |                                          | Clinic Site                      |
| Mark                        | Unruh         |         |                  | University of Pittsburgh         |                                          | Principal Investigator                                  |                                          | Clinic Site                      |
| Rachel                      | Hess          |         |                  | University of Pittsburgh         |                                          | Co-Principal Investigator                               |                                          | Clinic Site                      |
| Manisha                     | Jhamb         |         |                  | University of Pittsburgh         |                                          | Co-Investigator                                         |                                          | Clinic Site                      |
| Holly                       | Thomas        |         |                  | University of Pittsburgh         |                                          | Co-Investigator                                         |                                          | Clinic Site                      |
| Pam                         | Fazio         |         |                  | University of Pittsburgh         |                                          | Coordinator                                             |                                          | Clinic Site                      |
| Elle                        | Klixbull      |         |                  | University of Pittsburgh         |                                          | Coordinator                                             |                                          | Clinic Site                      |
| Melissa                     | Komlos-Weimer |         |                  | University of Pittsburgh         |                                          | Coordinator                                             |                                          | Clinic Site                      |
| LeeAnne                     | Mandich       |         |                  | University of Pittsburgh         |                                          | Coordinator                                             |                                          | Clinic Site                      |
| Tina                        | Vita          |         |                  | University of Pittsburgh         |                                          | Coordinator                                             |                                          | Clinic Site                      |
| Robert                      | Toto          |         |                  | University of Texas Southwestern |                                          | Principal Investigator                                  |                                          | Clinic Site                      |
| Peter                       | Van Buren     |         |                  | University of Texas Southwestern |                                          | Co-Investigator                                         |                                          | Clinic Site                      |
| Julia                       | Inrig         |         |                  | University of Texas Southwestern |                                          | Co-Investigator                                         |                                          | Clinic Site                      |
| Martha                      | Cruz          |         |                  | University of Texas Southwestern |                                          | Coordinator                                             |                                          | Clinic Site                      |
| Tammy                       | Lightfoot     |         |                  | University of Texas Southwestern |                                          | Coordinator                                             |                                          | Clinic Site                      |
| Nancy                       | Wang          |         |                  | University of Texas Southwestern |                                          | Coordinator                                             |                                          | Clinic Site                      |
| Lori                        | Webster       |         |                  | University of Texas Southwestern |                                          | Coordinator                                             |                                          | Clinic Site                      |
| Kalani                      | Rapheal       |         |                  | University of Utah               |                                          | Co-Investigator                                         |                                          | Clinic Site                      |

## Supplementary Online Content: Nonauthor Collaborators

\*Indicates required information. Only first name, last name, and suffix will appear in PubMed.

| First Name, Middle Initial* | Last Name*    | Suffix* | Academic Degrees | Institution           | Location (city, state/province, country) | Role or Contribution, eg, chair, principal investigator | Group (for manuscripts with more than 1) | Subgroup, eg, Steering Committee |
|-----------------------------|---------------|---------|------------------|-----------------------|------------------------------------------|---------------------------------------------------------|------------------------------------------|----------------------------------|
| Barry                       | Stults        |         |                  | University of Utah    |                                          | Co-Investigator                                         |                                          | Clinic Site                      |
| Tahir                       | Zaman         |         |                  | University of Utah    |                                          | Co-Investigator                                         |                                          | Clinic Site                      |
| Debra                       | Simmons       |         |                  | University of Utah    |                                          | Co-Investigator                                         |                                          | Clinic Site                      |
| Tooran                      | Lavasani      |         |                  | University of Utah    |                                          | Nurse Practitioner                                      |                                          | Clinic Site                      |
| Rebecca                     | Filipowicz    |         |                  | University of Utah    |                                          | Senior Research Analyst                                 |                                          | Clinic Site                      |
| Guo                         | Wei           |         |                  | University of Utah    |                                          | Senior Research Analyst                                 |                                          | Clinic Site                      |
| Gracie Mary                 | Miller        |         |                  | University of Utah    |                                          | Coordinator                                             |                                          | Clinic Site                      |
| Jenice                      | Harerra       |         |                  | University of Utah    |                                          | Coordinator                                             |                                          | Clinic Site                      |
| Jeff                        | Christensen   |         |                  | University of Utah    |                                          | Clinical Research Assistant                             |                                          | Clinic Site                      |
| Ajay                        | Giri          |         |                  | University of Utah    |                                          | Clinical Research Assistant                             |                                          | Clinic Site                      |
| Xiaorui                     | Chen          |         |                  | University of Utah    |                                          | Graduate Research Assistant                             |                                          | Clinic Site                      |
| Natalie                     | Anderton      |         |                  | University of Utah    |                                          | Graduate Research Assistant                             |                                          | Clinic Site                      |
| Arianna                     | Jensen        |         |                  | University of Utah    |                                          | Undergraduate Research Assistant                        |                                          | Clinic Site                      |
| Julia                       | Lewis         |         |                  | Vanderbilt University |                                          | Principal Investigator                                  |                                          | Clinic Site                      |
| Anna                        | Burgner       |         |                  | Vanderbilt University |                                          | Co-Investigator                                         |                                          | Clinic Site                      |
| Jamie P.                    | Dwyer         |         |                  | Vanderbilt University |                                          | Co-Investigator                                         |                                          | Clinic Site                      |
| Gerald                      | Schulman      |         |                  | Vanderbilt University |                                          | Co-Investigator                                         |                                          | Clinic Site                      |
| Terri                       | Herrud        |         |                  | Vanderbilt University |                                          | Coordinator                                             |                                          | Clinic Site                      |
| Ewanda                      | Leavell       |         |                  | Vanderbilt University |                                          | Coordinator                                             |                                          | Clinic Site                      |
| Tiffany                     | McCray        |         |                  | Vanderbilt University |                                          | Coordinator                                             |                                          | Clinic Site                      |
| Edwina                      | McNeil Simaan |         |                  | Vanderbilt University |                                          | Coordinator                                             |                                          | Clinic Site                      |
| Munmum                      | Puodel        |         |                  | Vanderbilt University |                                          | Coordinator                                             |                                          | Clinic Site                      |
| Malia                       | Reed          |         |                  | Vanderbilt University |                                          | Coordinator                                             |                                          | Clinic Site                      |
| Mohammed                    | Sika          |         |                  | Vanderbilt University |                                          | Coordinator                                             |                                          | Clinic Site                      |
| Delia                       | Woods         |         |                  | Vanderbilt University |                                          | Coordinator                                             |                                          | Clinic Site                      |
| Janice L.                   | Zirkenback    |         |                  | Vanderbilt University |                                          | Coordinator                                             |                                          | Clinic Site                      |

## Supplementary Online Content: Nonauthor Collaborators

\*Indicates required information. Only first name, last name, and suffix will appear in PubMed.

| First Name, Middle Initial* | Last Name*    | Suffix* | Academic Degrees | Institution                         | Location (city, state/province, country) | Role or Contribution, eg, chair, principal investigator | Group (for manuscripts with more than 1) | Subgroup, eg, Steering Committee |
|-----------------------------|---------------|---------|------------------|-------------------------------------|------------------------------------------|---------------------------------------------------------|------------------------------------------|----------------------------------|
| Dominic S.                  | Raj           |         |                  | George Washington University        |                                          | Principal Investigator                                  |                                          | Clinic Site                      |
| Scott                       | Cohen         |         |                  | George Washington University        |                                          | Co-Investigator                                         |                                          | Clinic Site                      |
| Samir                       | Patel         |         |                  | George Washington University        |                                          | Co-Investigator                                         |                                          | Clinic Site                      |
| Manuel                      | Velasquez     |         |                  | George Washington University        |                                          | Co-Investigator                                         |                                          | Clinic Site                      |
| Roshni S.                   | Bastian       |         |                  | George Washington University        |                                          | Coordinator                                             |                                          | Clinic Site                      |
| Maria                       | Wing          |         |                  | George Washington University        |                                          | Coordinator                                             |                                          | Clinic Site                      |
| Akshay                      | Roy-Chaudhury |         |                  | George Washington University        |                                          | Coordinator                                             |                                          | Clinic Site                      |
| Thomas                      | Depner        |         |                  | University of California Davis      |                                          | Principal Investigator                                  |                                          | Clinic Site                      |
| Lorien                      | Dalrymple     |         |                  | University of California Davis      |                                          | Co-Investigator                                         |                                          | Clinic Site                      |
| George                      | Kaysen        |         |                  | University of California Davis      |                                          | Co-Investigator                                         |                                          | Clinic Site                      |
| Susan                       | Anderson      |         |                  | University of California Davis      |                                          | Coordinator                                             |                                          | Clinic Site                      |
| John                        | Nord          |         |                  | Salt Lake City VA                   |                                          | Co-Investigator                                         |                                          | Clinic Site                      |
| Gracie Mary                 | Miller        |         |                  | Salt Lake City VA                   |                                          | Coordinator                                             |                                          | Clinic Site                      |
| Jenice                      | Harerra       |         |                  | Salt Lake City VA                   |                                          | Coordinator                                             |                                          | Clinic Site                      |
| Ajay                        | GIri          |         |                  | Salt Lake City VA                   |                                          | Coordinator                                             |                                          | Clinic Site                      |
| Joachim H.                  | Ix            |         |                  | Veterans Medical Reseach Foundation |                                          | Principal Investigator                                  |                                          | Clinic Site                      |
| Leonard                     | Goldenstein   |         |                  | Veterans Medical Reseach Foundation |                                          | Co-Principal Investigator                               |                                          | Clinic Site                      |
| Cynthia M.                  | Miracle       |         |                  | Veterans Medical Reseach Foundation |                                          | Co-Investigator                                         |                                          | Clinic Site                      |
| Nketi                       | Forbang       |         |                  | Veterans Medical Reseach Foundation |                                          | Coordinator                                             |                                          | Clinic Site                      |
| Maja                        | Mircic        |         |                  | Veterans Medical Reseach Foundation |                                          | Coordinator                                             |                                          | Clinic Site                      |
| Brenda                      | Thomas        |         |                  | Veterans Medical Reseach Foundation |                                          | Coordinator                                             |                                          | Clinic Site                      |

## Supplementary Online Content: Nonauthor Collaborators

\*Indicates required information. Only first name, last name, and suffix will appear in PubMed.

| First Name, Middle Initial* | Last Name* | Suffix* | Academic Degrees | Institution                           | Location (city, state/province, country) | Role or Contribution, eg, chair, principal investigator | Group (for manuscripts with more than 1) | Subgroup, eg, Steering Committee |
|-----------------------------|------------|---------|------------------|---------------------------------------|------------------------------------------|---------------------------------------------------------|------------------------------------------|----------------------------------|
| Tiffany                     | Tran       |         |                  | Veterans Medical Reseach Foundation   |                                          | Coordinator                                             |                                          | Clinic Site                      |
| Anjay                       | Rastogi    |         |                  | University of California Los Anegeles |                                          | Principal Investigator                                  |                                          | Clinic Site                      |
| Mihae                       | Kim        |         |                  | University of California Los Anegeles |                                          | Co-Investigator                                         |                                          | Clinic Site                      |
| Mohamad                     | Rashid     |         |                  | University of California Los Anegeles |                                          | Co-Principal Investigator                               |                                          | Clinic Site                      |
| Bianca                      | Lizarraga  |         |                  | University of California Los Anegeles |                                          | Coordinator                                             |                                          | Clinic Site                      |
| Amy                         | Hocza      |         |                  | University of California Los Anegeles |                                          | Coordinator                                             |                                          | Clinic Site                      |
| Kristine                    | Sarmosyan  |         |                  | University of California Los Anegeles |                                          | Coordinator                                             |                                          | Clinic Site                      |
| Jason                       | Norris     |         |                  | University of California Los Anegeles |                                          | Coordinator                                             |                                          | Clinic Site                      |
| Tushar                      | Sharma     |         |                  | University of California Los Anegeles |                                          | Coordinator                                             |                                          | Clinic Site                      |
| Amanda                      | Chjoy      |         |                  | University of California Los Anegeles |                                          | Coordinator                                             |                                          | Clinic Site                      |
| Eric                        | Bernard    |         |                  | University of California Los Anegeles |                                          | Coordinator                                             |                                          | Clinic Site                      |
| Eleanore                    | Cabrera    |         |                  | University of California Los Anegeles |                                          | Coordinator                                             |                                          | Clinic Site                      |
| Christina                   | Lopez      |         |                  | University of California Los Anegeles |                                          | Coordinator                                             |                                          | Clinic Site                      |
| Susana                      | Nunez      |         |                  | University of California Los Anegeles |                                          | Coordinator                                             |                                          | Clinic Site                      |
| Joseph                      | Riad       |         |                  | University of California Los Anegeles |                                          | Coordinator                                             |                                          | Clinic Site                      |
| Suzanne                     | Schweitzer |         |                  | University of California Los Anegeles |                                          | Coordinator                                             |                                          | Clinic Site                      |
| Siran                       | Sirop      |         |                  | University of California Los Anegeles |                                          | Coordinator                                             |                                          | Clinic Site                      |
| Sarah                       | Thomas     |         |                  | University of California Los Anegeles |                                          | Coordinator                                             |                                          | Clinic Site                      |

## Supplementary Online Content: Nonauthor Collaborators

\*Indicates required information. Only first name, last name, and suffix will appear in PubMed.

| First Name, Middle Initial* | Last Name* | Suffix* | Academic Degrees | Institution                          | Location (city, state/province, country) | Role or Contribution, eg, chair, principal investigator | Group (for manuscripts with more than 1) | Subgroup, eg, Steering Committee |
|-----------------------------|------------|---------|------------------|--------------------------------------|------------------------------------------|---------------------------------------------------------|------------------------------------------|----------------------------------|
| Lauren                      | Wada       |         |                  | University of California Los Angeles |                                          | Coordinator                                             |                                          | Clinic Site                      |
| Holly                       | Kramer     |         |                  | Loyola University Medical Center     |                                          | Principal Investigator                                  |                                          | Clinic Site                      |
| Vinod                       | Bansal     |         |                  | Loyola University Medical Center     |                                          | Co-Principal Investigator                               |                                          | Clinic Site                      |
| Corliss E.                  | Taylor     |         |                  | Loyola University Medical Center     |                                          | Coordinator                                             |                                          | Clinic Site                      |
| Mark S.                     | Segal      |         |                  | University of Florida                |                                          | Principal Investigator                                  |                                          | Clinic Site                      |
| Karen L.                    | Hall       |         |                  | University of Florida                |                                          | Co-Investigator                                         |                                          | Clinic Site                      |
| Amir                        | Kazory     |         |                  | University of Florida                |                                          | Co-Investigator                                         |                                          | Clinic Site                      |
| Lesa                        | Gilbert    |         |                  | University of Florida                |                                          | Coordinator                                             |                                          | Clinic Site                      |
| Linda                       | Owens      |         |                  | University of Florida                |                                          | Coordinator                                             |                                          | Clinic Site                      |
| Danielle                    | Poulton    |         |                  | University of Florida                |                                          | Coordinator                                             |                                          | Clinic Site                      |
| Elaine                      | Whidden    |         |                  | University of Florida                |                                          | Coordinator                                             |                                          | Clinic Site                      |
| Jocelyn                     | Wiggins    |         |                  | University of Michigan               |                                          | Principal Investigator                                  |                                          | Clinic Site                      |
| Caroline                    | Blaum      |         |                  | University of Michigan               |                                          | Principal Investigator                                  |                                          | Clinic Site                      |
| Linda                       | Nyquist    |         |                  | University of Michigan               |                                          | Co-Investigator                                         |                                          | Clinic Site                      |
| Lillian                     | Min        |         |                  | University of Michigan               |                                          | Co-Investigator                                         |                                          | Clinic Site                      |
| Tanya                       | Gure       |         |                  | University of Michigan               |                                          | Co-Investigator                                         |                                          | Clinic Site                      |
| Ruth                        | Lewis      |         |                  | University of Michigan               |                                          | Coordinator                                             |                                          | Clinic Site                      |
| Jennifer                    | Mawby      |         |                  | University of Michigan               |                                          | Coordinator                                             |                                          | Clinic Site                      |
| Eileen                      | Robinson   |         |                  | University of Michigan               |                                          | Coordinator                                             |                                          | Clinic Site                      |
| Suzanne                     | Oparil     |         |                  | University of Alabama at Birmingham  |                                          | Principal Investigator                                  |                                          | Clinical Center Network          |
| Cora E.                     | Lewis      |         |                  | University of Alabama at Birmingham  |                                          | Co-Principal Investigator                               |                                          | Clinical Center Network          |
| Virginia                    | Bradley    |         |                  | University of Alabama at Birmingham  |                                          | MIND Principal Investigator                             |                                          | Clinical Center Network          |
| David                       | Calhoun    |         |                  | University of Alabama at Birmingham  |                                          | Co-Investigator                                         |                                          | Clinical Center Network          |
| Stephen                     | Glasser    |         |                  | University of Alabama at Birmingham  |                                          | Co-Investigator                                         |                                          | Clinical Center Network          |

## Supplementary Online Content: Nonauthor Collaborators

\*Indicates required information. Only first name, last name, and suffix will appear in PubMed.

| First Name, Middle Initial* | Last Name*     | Suffix* | Academic Degrees | Institution                                    | Location (city, state/province, country) | Role or Contribution, eg, chair, principal investigator | Group (for manuscripts with more than 1) | Subgroup, eg, Steering Committee |
|-----------------------------|----------------|---------|------------------|------------------------------------------------|------------------------------------------|---------------------------------------------------------|------------------------------------------|----------------------------------|
| Kim                         | Jenkins        |         |                  | University of Alabama at Birmingham            |                                          | Coordinator                                             |                                          | Clinical Center Network          |
| Tom                         | Ramsey         |         |                  | University of Alabama at Birmingham            |                                          | Coordinator                                             |                                          | Clinical Center Network          |
| Nauman                      | Qureshi        |         |                  | Athens Internal Medicine                       |                                          | Principal Investigator                                  |                                          | Clinic Site                      |
| Karen                       | Ferguson       |         |                  | Athens Internal Medicine                       |                                          | Coordinator                                             |                                          | Clinic Site                      |
| Sumrah                      | Haider         |         |                  | Athens Internal Medicine                       |                                          | Coordinator                                             |                                          | Clinic Site                      |
| Mandy                       | James          |         |                  | Athens Internal Medicine                       |                                          | Coordinator                                             |                                          | Clinic Site                      |
| Christy                     | Jones          |         |                  | Athens Internal Medicine                       |                                          | Coordinator                                             |                                          | Clinic Site                      |
| Kim                         | Renfro         |         |                  | Athens Internal Medicine                       |                                          | Coordinator                                             |                                          | Clinic Site                      |
| April                       | Seay           |         |                  | Athens Internal Medicine                       |                                          | Coordinator                                             |                                          | Clinic Site                      |
| Carrie                      | Weigart        |         |                  | Athens Internal Medicine                       |                                          | Coordinator                                             |                                          | Clinic Site                      |
| Denyse                      | Thornley-Brown |         |                  | UAB -The Chronic Kidney Disease Clinic         |                                          | Principal Investigator                                  |                                          | Clinic Site                      |
| Dana                        | Rizik          |         |                  | UAB -The Chronic Kidney Disease Clinic         |                                          | Co-Investigator                                         |                                          | Clinic Site                      |
| Bari                        | Cotoon         |         |                  | UAB -The Chronic Kidney Disease Clinic         |                                          | Coordinator                                             |                                          | Clinic Site                      |
| Meredith                    | Fitz-Gerald    |         |                  | UAB -The Chronic Kidney Disease Clinic         |                                          | Coordinator                                             |                                          | Clinic Site                      |
| Tiffany                     | Grimes         |         |                  | UAB -The Chronic Kidney Disease Clinic         |                                          | Coordinator                                             |                                          | Clinic Site                      |
| Carolyn                     | Johnson        |         |                  | UAB -The Chronic Kidney Disease Clinic         |                                          | Coordinator                                             |                                          | Clinic Site                      |
| Sara                        | Kennedy        |         |                  | UAB -The Chronic Kidney Disease Clinic         |                                          | Coordinator                                             |                                          | Clinic Site                      |
| Chanel                      | Mason          |         |                  | UAB -The Chronic Kidney Disease Clinic         |                                          | Coordinator                                             |                                          | Clinic Site                      |
| Lesa                        | Rosato-Burson  |         |                  | UAB -The Chronic Kidney Disease Clinic         |                                          | Coordinator                                             |                                          | Clinic Site                      |
| Robin                       | Willingham     |         |                  | UAB -The Chronic Kidney Disease Clinic         |                                          | Coordinator                                             |                                          | Clinic Site                      |
| Eric                        | Judd           |         |                  | UAB - Vascular Biology and Hypertension Clinic |                                          | Co-Investigator                                         |                                          | Clinic Site                      |

## Supplementary Online Content: Nonauthor Collaborators

\*Indicates required information. Only first name, last name, and suffix will appear in PubMed.

| First Name, Middle Initial* | Last Name*        | Suffix* | Academic Degrees | Institution                                    | Location (city, state/province, country) | Role or Contribution, eg, chair, principal investigator | Group (for manuscripts with more than 1) | Subgroup, eg, Steering Committee |
|-----------------------------|-------------------|---------|------------------|------------------------------------------------|------------------------------------------|---------------------------------------------------------|------------------------------------------|----------------------------------|
| Tonya                       | Breaux-Shropshire |         |                  | UAB - Vascular Biology and Hypertension Clinic |                                          | Coordinator                                             |                                          | Clinic Site                      |
| Felice                      | Cook              |         |                  | UAB - Vascular Biology and Hypertension Clinic |                                          | Coordinator                                             |                                          | Clinic Site                      |
| Julia                       | Medina            |         |                  | UAB - Vascular Biology and Hypertension Clinic |                                          | Coordinator                                             |                                          | Clinic Site                      |
| Lama                        | Ghazi             |         |                  | UAB - Vascular Biology and Hypertension Clinic |                                          | Coordinator                                             |                                          | Clinic Site                      |
| Hemal                       | Bhatt             |         |                  | UAB - Vascular Biology and Hypertension Clinic |                                          | Coordinator                                             |                                          | Clinic Site                      |
| James                       | Lewis             |         |                  | Nephrology Associates PC                       |                                          | Principal Investigator                                  |                                          | Clinic Site                      |
| Roman                       | Brantley          |         |                  | Nephrology Associates PC                       |                                          | Co-Investigator                                         |                                          | Clinic Site                      |
| John                        | Brouillette       |         |                  | Nephrology Associates PC                       |                                          | Co-Investigator                                         |                                          | Clinic Site                      |
| Jeffrey                     | Glaze             |         |                  | Nephrology Associates PC                       |                                          | Co-Investigator                                         |                                          | Clinic Site                      |
| Stephanie                   | Hall              |         |                  | Nephrology Associates PC                       |                                          | Co-Investigator                                         |                                          | Clinic Site                      |
| Nancy                       | Hiott             |         |                  | Nephrology Associates PC                       |                                          | Co-Investigator                                         |                                          | Clinic Site                      |
| David                       | Tharpe            |         |                  | Nephrology Associates PC                       |                                          | Co-Investigator                                         |                                          | Clinic Site                      |
| Spencer                     | Boddy             |         |                  | Nephrology Associates PC                       |                                          | Coordinator                                             |                                          | Clinic Site                      |
| Catherine                   | Mack              |         |                  | Nephrology Associates PC                       |                                          | Coordinator                                             |                                          | Clinic Site                      |
| Catherine                   | Womack            |         |                  | University of Tennessee Health Science Center  |                                          | Co-Investigator                                         |                                          | Clinic Site                      |
| Keiko                       | Asao              |         |                  | University of Tennessee Health Science Center  |                                          | Co-Investigator                                         |                                          | Clinic Site                      |
| Beate                       | Griffin           |         |                  | University of Tennessee Health Science Center  |                                          | Coordinator                                             |                                          | Clinic Site                      |
| Carol                       | Hendrix           |         |                  | University of Tennessee Health Science Center  |                                          | Coordinator                                             |                                          | Clinic Site                      |
| Karen                       | Johnson           |         |                  | University of Tennessee Health Science Center  |                                          | Coordinator                                             |                                          | Clinic Site                      |
| Lisa                        | Jones             |         |                  | University of Tennessee Health Science Center  |                                          | Coordinator                                             |                                          | Clinic Site                      |
| Chelsea                     | Towers            |         |                  | University of Tennessee Health Science Center  |                                          | Coordinator                                             |                                          | Clinic Site                      |

## Supplementary Online Content: Nonauthor Collaborators

\*Indicates required information. Only first name, last name, and suffix will appear in PubMed.

| First Name, Middle Initial* | Last Name*           | Suffix* | Academic Degrees | Institution                                            | Location (city, state/province, country) | Role or Contribution, eg, chair, principal investigator | Group (for manuscripts with more than 1) | Subgroup, eg, Steering Committee |
|-----------------------------|----------------------|---------|------------------|--------------------------------------------------------|------------------------------------------|---------------------------------------------------------|------------------------------------------|----------------------------------|
| Henry                       | Punzi                |         |                  | Punzi Medical Center and Trinity Hypertension Research |                                          | Principal Investigator                                  |                                          | Clinic Site                      |
| Kathy                       | Cassidy              |         |                  | Punzi Medical Center and Trinity Hypertension Research |                                          | Coordinator                                             |                                          | Clinic Site                      |
| Kristin                     | Schumacher           |         |                  | Punzi Medical Center and Trinity Hypertension Research |                                          | Coordinator                                             |                                          | Clinic Site                      |
| Carmen                      | Irizarry             |         |                  | Family Care Practice                                   |                                          | Principal Investigator                                  |                                          | Clinic Site                      |
| Ilma                        | Colon                |         |                  | Family Care Practice                                   |                                          | Coordinator                                             |                                          | Clinic Site                      |
| Pedro                       | Colon-Ortiz          |         |                  | Centro Cardiovascular de Caguas                        |                                          | Principal Investigator                                  |                                          | Clinic Site                      |
| Pedro J.                    | Colon-Hernandez      |         |                  | Centro Cardiovascular de Caguas                        |                                          | Co-Principal Investigator                               |                                          | Clinic Site                      |
| Orlando J.                  | Carrasquillo-Navarro |         |                  | Centro Cardiovascular de Caguas                        |                                          | Co-Investigator                                         |                                          | Clinic Site                      |
| Merari                      | Carrasquillo         |         |                  | Centro Cardiovascular de Caguas                        |                                          | Coordinator                                             |                                          | Clinic Site                      |
| Nivea                       | Vasquez              |         |                  | Centro Cardiovascular de Caguas                        |                                          | Coordinator                                             |                                          | Clinic Site                      |
| Miguel                      | Sosa-Padilla         |         |                  | Miguel Sosa Padilla - Private Practice                 |                                          | Principal Investigator                                  |                                          | Clinic Site                      |
| Alex                        | Cintron-Pinero       |         |                  | Miguel Sosa Padilla - Private Practice                 |                                          | Co-Investigator                                         |                                          | Clinic Site                      |
| Mayra                       | Ayala                |         |                  | Miguel Sosa Padilla - Private Practice                 |                                          | Coordinator                                             |                                          | Clinic Site                      |
| Olga                        | Pacheco              |         |                  | Miguel Sosa Padilla - Private Practice                 |                                          | Coordinator                                             |                                          | Clinic Site                      |
| Catalina                    | Rivera               |         |                  | Miguel Sosa Padilla - Private Practice                 |                                          | Coordinator                                             |                                          | Clinic Site                      |
| Irma                        | Sotomayor-Gonzalez   |         |                  | Miguel Sosa Padilla - Private Practice                 |                                          | Coordinator                                             |                                          | Clinic Site                      |
| Jamie                       | Claudio              |         |                  | Altamira Family Practice and Research Institute        |                                          | Principal Investigator                                  |                                          | Clinic Site                      |



## Supplementary Online Content: Nonauthor Collaborators

\*Indicates required information. Only first name, last name, and suffix will appear in PubMed.

| First Name, Middle Initial* | Last Name*    | Suffix* | Academic Degrees | Institution                                     | Location (city, state/province, country) | Role or Contribution, eg, chair, principal investigator | Group (for manuscripts with more than 1) | Subgroup, eg, Steering Committee |
|-----------------------------|---------------|---------|------------------|-------------------------------------------------|------------------------------------------|---------------------------------------------------------|------------------------------------------|----------------------------------|
| Jose                        | Lazaro        |         |                  | Altamira Family Practice and Research Institute |                                          | Coordinator                                             |                                          | Clinic Site                      |
| Migdalia                    | Arce          |         |                  | Altamira Family Practice and Research Institute |                                          | Coordinator                                             |                                          | Clinic Site                      |
| Lourdes                     | Heres         |         |                  | Altamira Family Practice and Research Institute |                                          | Coordinator                                             |                                          | Clinic Site                      |
| Alba                        | Perez         |         |                  | Altamira Family Practice and Research Institute |                                          | Coordinator                                             |                                          | Clinic Site                      |
| Jose                        | Tavarez-Valle |         |                  | Centro Clinico San Patricio                     |                                          | Principal Investigator                                  |                                          | Clinic Site                      |
| Ferlinda                    | Arocho        |         |                  | Centro Clinico San Patricio                     |                                          | Coordinator                                             |                                          | Clinic Site                      |
| Mercedes                    | Torres        |         |                  | Centro Clinico San Patricio                     |                                          | Coordinator                                             |                                          | Clinic Site                      |
| Melvaliz                    | Vazquez       |         |                  | Centro Clinico San Patricio                     |                                          | Coordinator                                             |                                          | Clinic Site                      |
| Gerard P.                   | Aurigemma     |         |                  | University of Massachusetts                     |                                          | Principal Investigator                                  |                                          | Clinic Site                      |
| Rebecca                     | TakisSmith    |         |                  | University of Massachusetts                     |                                          | Co-Investigator                                         |                                          | Clinic Site                      |
| Julie                       | Andrieni      |         |                  | University of Massachusetts                     |                                          | Co-Investigator                                         |                                          | Clinic Site                      |
| Noelle                      | Bodkin        |         |                  | University of Massachusetts                     |                                          | Coordinator                                             |                                          | Clinic Site                      |
| Kiran                       | Chaudhary     |         |                  | University of Massachusetts                     |                                          | Coordinator                                             |                                          | Clinic Site                      |
| Paula                       | Hu            |         |                  | University of Massachusetts                     |                                          | Coordinator                                             |                                          | Clinic Site                      |
| John                        | Kostis        |         |                  | Rutgers - Robert Wood Johnson Medical School    |                                          | Principal Investigator                                  |                                          | Clinic Site                      |
| Nora                        | Cosgrove      |         |                  | Rutgers - Robert Wood Johnson Medical School    |                                          | Coordinator                                             |                                          | Clinic Site                      |
| Denise                      | Bankowski     |         |                  | Rutgers - Robert Wood Johnson Medical School    |                                          | Coordinator                                             |                                          | Clinic Site                      |
| Monica                      | Boleyn        |         |                  | Rutgers - Robert Wood Johnson Medical School    |                                          | Coordinator                                             |                                          | Clinic Site                      |
| Laurie                      | Casazza       |         |                  | Rutgers - Robert Wood Johnson Medical School    |                                          | Coordinator                                             |                                          | Clinic Site                      |
| Victoria                    | Giresi        |         |                  | Rutgers - Robert Wood Johnson Medical School    |                                          | Coordinator                                             |                                          | Clinic Site                      |
| Tosha                       | Patel         |         |                  | Rutgers - Robert Wood Johnson Medical School    |                                          | Coordinator                                             |                                          | Clinic Site                      |
| Erin                        | Squindo       |         |                  | Rutgers - Robert Wood Johnson Medical School    |                                          | Coordinator                                             |                                          | Clinic Site                      |

## Supplementary Online Content: Nonauthor Collaborators

\*Indicates required information. Only first name, last name, and suffix will appear in PubMed.

| First Name, Middle Initial* | Last Name*    | Suffix* | Academic Degrees | Institution                                  | Location (city, state/province, country) | Role or Contribution, eg, chair, principal investigator | Group (for manuscripts with more than 1) | Subgroup, eg, Steering Committee |
|-----------------------------|---------------|---------|------------------|----------------------------------------------|------------------------------------------|---------------------------------------------------------|------------------------------------------|----------------------------------|
| Yan                         | Wu            |         |                  | Rutgers - Robert Wood Johnson Medical School |                                          | Coordinator                                             |                                          | Clinic Site                      |
| Zeb                         | Henson        |         |                  | University of Mississippi Medical Center     |                                          | Principal Investigator                                  |                                          | Clinic Site                      |
| Marion                      | Wofford       |         |                  | University of Mississippi Medical Center     |                                          | Co-Principal Investigator                               |                                          | Clinic Site                      |
| Jessica                     | Lowery        |         |                  | University of Mississippi Medical Center     |                                          | Co-Investigator                                         |                                          | Clinic Site                      |
| Deborah                     | Minor         |         |                  | University of Mississippi Medical Center     |                                          | Co-Investigator                                         |                                          | Clinic Site                      |
| Kimberley                   | Harkins       |         |                  | University of Mississippi Medical Center     |                                          | Co-Investigator                                         |                                          | Clinic Site                      |
| Alexander                   | Auchus        |         |                  | University of Mississippi Medical Center     |                                          | Co-Investigator                                         |                                          | Clinic Site                      |
| Michael                     | Flessner      |         |                  | University of Mississippi Medical Center     |                                          | Co-Investigator                                         |                                          | Clinic Site                      |
| Cathy                       | Adair         |         |                  | University of Mississippi Medical Center     |                                          | Coordinator                                             |                                          | Clinic Site                      |
| Jordan                      | Asher         |         |                  | Nashville Medical Group                      |                                          | Principal Investigator                                  |                                          | Clinic Site                      |
| Debbie                      | Loope         |         |                  | Nashville Medical Group                      |                                          | Coordinator                                             |                                          | Clinic Site                      |
| Rita                        | Cobb          |         |                  | Nashville Medical Group                      |                                          | Coordinator                                             |                                          | Clinic Site                      |
| Reiner                      | Venegas       |         |                  | Nashville Medical Group                      |                                          | Coordinator                                             |                                          | Clinic Site                      |
| Thomas                      | Bigger        |         |                  | New York Irving Pavilion Research            |                                          | Principal Investigator                                  |                                          | Clinic Site                      |
| Natalie                     | Bello         |         |                  | New York Irving Pavilion Research            |                                          | Co-Principal Investigator                               |                                          | Clinic Site                      |
| Shunichi                    | Homma         |         |                  | New York Irving Pavilion Research            |                                          | Co-Principal Investigator                               |                                          | Clinic Site                      |
| Daniel                      | Donovan       |         |                  | New York Irving Pavilion Research            |                                          | Co-Principal Investigator                               |                                          | Clinic Site                      |
| Carlos                      | Lopez-Jimenez |         |                  | New York Irving Pavilion Research            |                                          | Co-Investigator                                         |                                          | Clinic Site                      |
| Amilcar                     | Tirado        |         |                  | New York Irving Pavilion Research            |                                          | Coordinator                                             |                                          | Clinic Site                      |

## Supplementary Online Content: Nonauthor Collaborators

\*Indicates required information. Only first name, last name, and suffix will appear in PubMed.

| First Name, Middle Initial* | Last Name* | Suffix* | Academic Degrees | Institution                                                            | Location (city, state/province, country) | Role or Contribution, eg, chair, principal investigator | Group (for manuscripts with more than 1) | Subgroup, eg, Steering Committee |
|-----------------------------|------------|---------|------------------|------------------------------------------------------------------------|------------------------------------------|---------------------------------------------------------|------------------------------------------|----------------------------------|
| Asqual                      | Gataneh    |         |                  | New York Irving Pavilion Research - CTSA Satellite Columbia University |                                          | Co-Principal Investigator                               |                                          | Clinic Site                      |
| Rocky                       | Tang       |         |                  | New York Irving Pavilion Research - CTSA Satellite Columbia University |                                          | Coordinator                                             |                                          | Clinic Site                      |
| Sabrina                     | Durant     |         |                  | New York Irving Pavilion Research - CTSA Satellite Columbia University |                                          | Coordinator                                             |                                          | Clinic Site                      |
| Matthew                     | Maurer     |         |                  | Clinical Cardiovascular Research Lab for the Elderly                   |                                          | Co-Principal Investigator                               |                                          | Clinic Site                      |
| Sergio                      | Teruya     |         |                  | Clinical Cardiovascular Research Lab for the Elderly                   |                                          | Research Scientist                                      |                                          | Clinic Site                      |
| Stephen                     | Helmke     |         |                  | Clinical Cardiovascular Research Lab for the Elderly                   |                                          | Coordinator                                             |                                          | Clinic Site                      |
| Julissa                     | Alvarez    |         |                  | Clinical Cardiovascular Research Lab for the Elderly                   |                                          | Coordinator                                             |                                          | Clinic Site                      |
| Ruth                        | Campbell   |         |                  | Medical University of South Carolina Nephrology                        |                                          | Principal Investigator                                  |                                          | Clinic Site                      |
| Roberto                     | Pisoni     |         |                  | Medical University of South Carolina Nephrology                        |                                          | Co-Investigator                                         |                                          | Clinic Site                      |
| Rachel                      | Sturdivant |         |                  | Medical University of South Carolina Nephrology                        |                                          | Co-Investigator                                         |                                          | Clinic Site                      |
| Deborah                     | Brooks     |         |                  | Medical University of South Carolina Nephrology                        |                                          | Co-Investigator                                         |                                          | Clinic Site                      |
| Caroline                    | Counts     |         |                  | Medical University of South Carolina Nephrology                        |                                          | Coordinator                                             |                                          | Clinic Site                      |
| Vickie                      | Hunt       |         |                  | Medical University of South Carolina Nephrology                        |                                          | Coordinator                                             |                                          | Clinic Site                      |
| Lori                        | Spillers   |         |                  | Medical University of South Carolina Nephrology                        |                                          | Coordinator                                             |                                          | Clinic Site                      |
| Donald                      | Brautigam  |         |                  | Great Lakes Medical Research                                           |                                          | Principal Investigator                                  |                                          | Clinic Site                      |
| Timothy                     | Kitchen    |         |                  | Great Lakes Medical Research                                           |                                          | Co-Investigator                                         |                                          | Clinic Site                      |

## Supplementary Online Content: Nonauthor Collaborators

\*Indicates required information. Only first name, last name, and suffix will appear in PubMed.

| First Name, Middle Initial* | Last Name*       | Suffix* | Academic Degrees | Institution                            | Location (city, state/province, country) | Role or Contribution, eg, chair, principal investigator | Group (for manuscripts with more than 1) | Subgroup, eg, Steering Committee |
|-----------------------------|------------------|---------|------------------|----------------------------------------|------------------------------------------|---------------------------------------------------------|------------------------------------------|----------------------------------|
| Timothy                     | Gorman           |         |                  | Great Lakes Medical Research           |                                          | Co-Investigator                                         |                                          | Clinic Site                      |
| Jessica                     | Sayers           |         |                  | Great Lakes Medical Research           |                                          | Coordinator                                             |                                          | Clinic Site                      |
| Sarah                       | Button           |         |                  | Great Lakes Medical Research           |                                          | Coordinator                                             |                                          | Clinic Site                      |
| June                        | Chiarot          |         |                  | Great Lakes Medical Research           |                                          | Coordinator                                             |                                          | Clinic Site                      |
| Rosemary                    | Fischer          |         |                  | Great Lakes Medical Research           |                                          | Coordinator                                             |                                          | Clinic Site                      |
| Melissa                     | Lyon             |         |                  | Great Lakes Medical Research           |                                          | Coordinator                                             |                                          | Clinic Site                      |
| Maria                       | Resnick          |         |                  | Great Lakes Medical Research           |                                          | Coordinator                                             |                                          | Clinic Site                      |
| Nicole                      | Hodges           |         |                  | Great Lakes Medical Research           |                                          | Research Assistant                                      |                                          | Clinic Site                      |
| Jennifer                    | Ferreira         |         |                  | Great Lakes Medical Research           |                                          | Site Manager                                            |                                          | Clinic Site                      |
| William                     | Cushman          |         |                  | Memphis Veteran Affairs Medical Center |                                          | Principal Investigator                                  |                                          | Clinical Center Network          |
| Barry                       | Wall             |         |                  | Memphis Veteran Affairs Medical Center |                                          | Co-Investigator                                         |                                          | Clinical Center Network          |
| Linda                       | Nichols          |         |                  | Memphis Veteran Affairs Medical Center |                                          | MIND Principal Investigator                             |                                          | Clinical Center Network          |
| Robert                      | Burns            |         |                  | Memphis Veteran Affairs Medical Center |                                          | Co-Investigator                                         |                                          | Clinical Center Network          |
| Jennifer                    | Martindale-Adams |         |                  | Memphis Veteran Affairs Medical Center |                                          | Co-Investigator                                         |                                          | Clinical Center Network          |
| Dan                         | Berlowitz        |         |                  | Memphis Veteran Affairs Medical Center |                                          | Co-Investigator                                         |                                          | Clinical Center Network          |
| Elizabeth                   | Clark            |         |                  | Memphis Veteran Affairs Medical Center |                                          | Coordinator                                             |                                          | Clinical Center Network          |
| Sandy                       | Walsh            |         |                  | Memphis Veteran Affairs Medical Center |                                          | Coordinator                                             |                                          | Clinical Center Network          |
| Terry                       | Geraci           |         |                  | Memphis Veteran Affairs Medical Center |                                          | Coordinator                                             |                                          | Clinical Center Network          |

## Supplementary Online Content: Nonauthor Collaborators

\*Indicates required information. Only first name, last name, and suffix will appear in PubMed.

| First Name, Middle Initial* | Last Name*  | Suffix* | Academic Degrees | Institution                            | Location (city, state/province, country) | Role or Contribution, eg, chair, principal investigator | Group (for manuscripts with more than 1) | Subgroup, eg, Steering Committee |
|-----------------------------|-------------|---------|------------------|----------------------------------------|------------------------------------------|---------------------------------------------------------|------------------------------------------|----------------------------------|
| Carol                       | Huff        |         |                  | Memphis Veteran Affairs Medical Center |                                          | Budget Analyst                                          |                                          | Clinical Center Network          |
| Linda                       | Shaw        |         |                  | Memphis Veteran Affairs Medical Center |                                          | Research Assistant                                      |                                          | Clinical Center Network          |
| Karen                       | Servilla    |         |                  | New Mexico VA Healthcare System        |                                          | Principal Investigator                                  |                                          | Clinic Site                      |
| Darlene                     | Vigil       |         |                  | New Mexico VA Healthcare System        |                                          | Co-Investigator                                         |                                          | Clinic Site                      |
| Terry                       | Barrett     |         |                  | New Mexico VA Healthcare System        |                                          | Coordinator                                             |                                          | Clinic Site                      |
| Mary Ellen                  | Sweeney     |         |                  | Atlanta VAMC                           |                                          | Principal Investigator                                  |                                          | Clinic Site                      |
| Rebecca                     | Johnson     |         |                  | Atlanta VAMC                           |                                          | Co-Investigator                                         |                                          | Clinic Site                      |
| Susan                       | McConnell   |         |                  | Atlanta VAMC                           |                                          | Co-Investigator                                         |                                          | Clinic Site                      |
| Khadijeh Shahid             | Salles      |         |                  | Atlanta VAMC                           |                                          | Co-Investigator                                         |                                          | Clinic Site                      |
| Francoise                   | Watson      |         |                  | Atlanta VAMC                           |                                          | Co-Investigator                                         |                                          | Clinic Site                      |
| Cheryl                      | Schenk      |         |                  | Atlanta VAMC                           |                                          | Coordinator                                             |                                          | Clinic Site                      |
| Laura                       | Whittington |         |                  | Atlanta VAMC                           |                                          | Coordinator                                             |                                          | Clinic Site                      |
| Maxine                      | Maher       |         |                  | Atlanta VAMC                           |                                          | Coordinator                                             |                                          | Clinic Site                      |
| Jonathan                    | Williams    |         |                  | VA Boston Healthcare System            |                                          | Principal Investigator                                  |                                          | Clinic Site                      |
| Stephen                     | Swartz      |         |                  | VA Boston Healthcare System            |                                          | Principal Investigator                                  |                                          | Clinic Site                      |
| Paul                        | Conlin      |         |                  | VA Boston Healthcare System            |                                          | Co-Investigator                                         |                                          | Clinic Site                      |
| George                      | Alexis      |         |                  | VA Boston Healthcare System            |                                          | Coordinator                                             |                                          | Clinic Site                      |
| Rebecca                     | Lamkin      |         |                  | VA Boston Healthcare System            |                                          | Coordinator                                             |                                          | Clinic Site                      |
| Patti                       | Underwood   |         |                  | VA Boston Healthcare System            |                                          | Coordinator                                             |                                          | Clinic Site                      |
| Helen                       | Gomes       |         |                  | VA Boston Healthcare System            |                                          | Coordinator                                             |                                          | Clinic Site                      |
| Clive                       | Rosendorff  |         |                  | James J Peters VAMC                    |                                          | Principal Investigator                                  |                                          | Clinic Site                      |
| Stephen                     | Atlas       |         |                  | James J Peters VAMC                    |                                          | Co-Investigator                                         |                                          | Clinic Site                      |

## Supplementary Online Content: Nonauthor Collaborators

\*Indicates required information. Only first name, last name, and suffix will appear in PubMed.

| First Name, Middle Initial* | Last Name*   | Suffix* | Academic Degrees | Institution                     | Location (city, state/province, country) | Role or Contribution, eg, chair, principal investigator | Group (for manuscripts with more than 1) | Subgroup, eg, Steering Committee |
|-----------------------------|--------------|---------|------------------|---------------------------------|------------------------------------------|---------------------------------------------------------|------------------------------------------|----------------------------------|
| Saadat                      | Khan         |         |                  | James J Peters VAMC             |                                          | Co-Investigator                                         |                                          | Clinic Site                      |
| Waddy                       | Gonzalez     |         |                  | James J Peters VAMC             |                                          | Co-Investigator                                         |                                          | Clinic Site                      |
| Samih                       | Barcham      |         |                  | James J Peters VAMC             |                                          | Co-Investigator                                         |                                          | Clinic Site                      |
| Lawrence                    | Kwon         |         |                  | James J Peters VAMC             |                                          | Co-Investigator                                         |                                          | Clinic Site                      |
| Matar                       | Matar        |         |                  | James J Peters VAMC             |                                          | Coordinator                                             |                                          | Clinic Site                      |
| Anwar                       | Adhami       |         |                  | James J Peters VAMC             |                                          | Coordinator                                             |                                          | Clinic Site                      |
| Jan                         | Basile       |         |                  | Ralph H. Johnson VAMC           |                                          | Principal Investigator                                  |                                          | Clinic Site                      |
| Joseph                      | John         |         |                  | Ralph H. Johnson VAMC           |                                          | Principal Investigator                                  |                                          | Clinic Site                      |
| Deborah                     | Ham          |         |                  | Ralph H. Johnson VAMC           |                                          | Coordinator                                             |                                          | Clinic Site                      |
| Hadi                        | Baig         |         |                  | Ralph H. Johnson VAMC           |                                          | Coordinator                                             |                                          | Clinic Site                      |
| Mohammed                    | Saklayen     |         |                  | Dayton VAMC                     |                                          | Principal Investigator                                  |                                          | Clinic Site                      |
| Jason                       | Yap          |         |                  | Dayton VAMC                     |                                          | Co-Investigator                                         |                                          | Clinic Site                      |
| Helen                       | Neff         |         |                  | Dayton VAMC                     |                                          | Coordinator                                             |                                          | Clinic Site                      |
| Carol                       | Miller       |         |                  | Dayton VAMC                     |                                          | Coordinator                                             |                                          | Clinic Site                      |
| Ling                        | Zheng-Phelan |         |                  | Dayton VAMC                     |                                          | Coordinator                                             |                                          | Clinic Site                      |
| Saib                        | Gappy        |         |                  | John D. Dingell VAMC            |                                          | Principal Investigator                                  |                                          | Clinic Site                      |
| Shiva                       | Rau          |         |                  | John D. Dingell VAMC            |                                          | Co-Investigator                                         |                                          | Clinic Site                      |
| Arathi                      | Raman        |         |                  | John D. Dingell VAMC            |                                          | Co-Investigator                                         |                                          | Clinic Site                      |
| Vicki                       | Berchou      |         |                  | John D. Dingell VAMC            |                                          | Coordinator                                             |                                          | Clinic Site                      |
| Elizabeth                   | Jones        |         |                  | John D. Dingell VAMC            |                                          | Coordinator                                             |                                          | Clinic Site                      |
| Erin                        | Olgren       |         |                  | John D. Dingell VAMC            |                                          | Coordinator                                             |                                          | Clinic Site                      |
| Cynthia                     | Marbury      |         |                  | John D. Dingell VAMC            |                                          | Coordinator                                             |                                          | Clinic Site                      |
| Michael                     | Yudd         |         |                  | VA New Jersey Healthcare System |                                          | Principal Investigator                                  |                                          | Clinic Site                      |
| Sithiporn                   | Sastrasinh   |         |                  | VA New Jersey Healthcare System |                                          | Principal Investigator                                  |                                          | Clinic Site                      |
| Jennine                     | Michaud      |         |                  | VA New Jersey Healthcare System |                                          | Co-Investigator                                         |                                          | Clinic Site                      |
| Jessica                     | Fiore        |         |                  | VA New Jersey Healthcare System |                                          | Coordinator                                             |                                          | Clinic Site                      |
| Marianne                    | Kutza        |         |                  | VA New Jersey Healthcare System |                                          | Coordinator                                             |                                          | Clinic Site                      |

## Supplementary Online Content: Nonauthor Collaborators

\*Indicates required information. Only first name, last name, and suffix will appear in PubMed.

| First Name, Middle Initial* | Last Name* | Suffix* | Academic Degrees | Institution                                 | Location (city, state/province, country) | Role or Contribution, eg, chair, principal investigator | Group (for manuscripts with more than 1) | Subgroup, eg, Steering Committee |
|-----------------------------|------------|---------|------------------|---------------------------------------------|------------------------------------------|---------------------------------------------------------|------------------------------------------|----------------------------------|
| Ronald                      | Shorr      |         |                  | Malcom Randall VAMC                         |                                          | Principal Investigator                                  |                                          | Clinic Site                      |
| Rattana                     | Mount      |         |                  | Malcom Randall VAMC                         |                                          | Co-Investigator                                         |                                          | Clinic Site                      |
| Helen                       | Dunn       |         |                  | Malcom Randall VAMC                         |                                          | Coordinator                                             |                                          | Clinic Site                      |
| Susan                       | Stinson    |         |                  | Malcom Randall VAMC                         |                                          | Coordinator                                             |                                          | Clinic Site                      |
| Jessica                     | Hunter     |         |                  | Malcom Randall VAMC                         |                                          | Coordinator                                             |                                          | Clinic Site                      |
| Addison                     | Taylor     |         |                  | Michael E Debakey VAMC                      |                                          | Principal Investigator                                  |                                          | Clinic Site                      |
| Jeffery                     | Bates      |         |                  | Michael E Debakey VAMC                      |                                          | Co-Investigator                                         |                                          | Clinic Site                      |
| Catherine                   | Anderson   |         |                  | Michael E Debakey VAMC                      |                                          | Coordinator                                             |                                          | Clinic Site                      |
| Kent                        | Kirchner   |         |                  | GV (Sonny) Montgomery VAMC                  |                                          | Principal Investigator                                  |                                          | Clinic Site                      |
| Jodi                        | Stubbs     |         |                  | GV (Sonny) Montgomery VAMC                  |                                          | Co-I                                                    |                                          | Clinic Site                      |
| Ardell                      | Hinton     |         |                  | GV (Sonny) Montgomery VAMC                  |                                          | Co-I                                                    |                                          | Clinic Site                      |
| Anita                       | Spencer    |         |                  | GV (Sonny) Montgomery VAMC                  |                                          | Coordinator                                             |                                          | Clinic Site                      |
| Santosh                     | Sharma     |         |                  | Kansas City VAMC                            |                                          | Principal Investigator                                  |                                          | Clinic Site                      |
| Thomas                      | Wiegmann   |         |                  | Kansas City VAMC                            |                                          | Principal Investigator                                  |                                          | Clinic Site                      |
| Smita                       | Mehta      |         |                  | Kansas City VAMC                            |                                          | Coordinator                                             |                                          | Clinic Site                      |
| Michelle                    | Krause     |         |                  | John L McClellan Memorial Veterans Hospital |                                          | Principal Investigator                                  |                                          | Clinic Site                      |
| Kate                        | Dishongh   |         |                  | John L McClellan Memorial Veterans Hospital |                                          | Coordinator                                             |                                          | Clinic Site                      |
| Richard                     | Childress  |         |                  | Memphis Veteran Affairs Medical Center      |                                          | Co-Investigator                                         |                                          | Clinic Site                      |
| Geeta                       | Gyamlani   |         |                  | Memphis Veteran Affairs Medical Center      |                                          | Co-Investigator                                         |                                          | Clinic Site                      |
| Atossa                      | Niakan     |         |                  | Memphis Veteran Affairs Medical Center      |                                          | Co-Investigator                                         |                                          | Clinic Site                      |
| Cathy                       | Thompson   |         |                  | Memphis Veteran Affairs Medical Center      |                                          | Co-Investigator                                         |                                          | Clinic Site                      |

## Supplementary Online Content: Nonauthor Collaborators

\*Indicates required information. Only first name, last name, and suffix will appear in PubMed.

| First Name, Middle Initial* | Last Name* | Suffix* | Academic Degrees | Institution                            | Location (city, state/province, country) | Role or Contribution, eg, chair, principal investigator | Group (for manuscripts with more than 1) | Subgroup, eg, Steering Committee |
|-----------------------------|------------|---------|------------------|----------------------------------------|------------------------------------------|---------------------------------------------------------|------------------------------------------|----------------------------------|
| Janelle                     | Moody      |         |                  | Memphis Veteran Affairs Medical Center |                                          | Coordinator                                             |                                          | Clinic Site                      |
| Carolyn                     | Gresham    |         |                  | Memphis Veteran Affairs Medical Center |                                          | Coordinator                                             |                                          | Clinic Site                      |
| Jeffrey                     | Whittle    |         |                  | Clement J Zablocki VAMC                |                                          | Principal Investigator                                  |                                          | Clinic Site                      |
| Gary                        | Barnas     |         |                  | Clement J Zablocki VAMC                |                                          | Co-Investigator                                         |                                          | Clinic Site                      |
| Dawn                        | Wolfgram   |         |                  | Clement J Zablocki VAMC                |                                          | Co-Investigator                                         |                                          | Clinic Site                      |
| Heidi                       | Cortese    |         |                  | Clement J Zablocki VAMC                |                                          | Coordinator                                             |                                          | Clinic Site                      |
| Jonette                     | Johnson    |         |                  | Clement J Zablocki VAMC                |                                          | Coordinator                                             |                                          | Clinic Site                      |
| Christianne                 | Roumie     |         |                  | Nashville VAMC / TVHS-GRECC            |                                          | Principal Investigator                                  |                                          | Clinic Site                      |
| Adriana                     | Hung       |         |                  | Nashville VAMC / TVHS-GRECC            |                                          | Co-Investigator                                         |                                          | Clinic Site                      |
| Jennifer                    | Wharton    |         |                  | Nashville VAMC / TVHS-GRECC            |                                          | Coordinator                                             |                                          | Clinic Site                      |
| Kurt                        | Niesner    |         |                  | Nashville VAMC / TVHS-GRECC            |                                          | Coordinator                                             |                                          | Clinic Site                      |
| Lois                        | Katz       |         |                  | VA New York Harbor Healthcare          |                                          | Principal Investigator                                  |                                          | Clinic Site                      |
| Elizabeth                   | Richardson |         |                  | VA New York Harbor Healthcare          |                                          | Coordinator                                             |                                          | Clinic Site                      |
| George                      | Brock      |         |                  | VA New York Harbor Healthcare          |                                          | Coordinator                                             |                                          | Clinic Site                      |
| Joanne                      | Holland    |         |                  | Northport VAMC                         |                                          | Principal Investigator                                  |                                          | Clinic Site                      |
| Troy                        | Dixon      |         |                  | Northport VAMC                         |                                          | Principal Investigator                                  |                                          | Clinic Site                      |
| Athena                      | Zias       |         |                  | Northport VAMC                         |                                          | Principal Investigator                                  |                                          | Clinic Site                      |
| Christine                   | Spiller    |         |                  | Northport VAMC                         |                                          | Coordinator                                             |                                          | Clinic Site                      |
| Penelope                    | Baker      |         |                  | Phoenix VA Healthcare System           |                                          | Principal Investigator                                  |                                          | Clinic Site                      |
| James                       | Felicetta  |         |                  | Phoenix VA Healthcare System           |                                          | Principal Investigator                                  |                                          | Clinic Site                      |



## Supplementary Online Content: Nonauthor Collaborators

\*Indicates required information. Only first name, last name, and suffix will appear in PubMed.

| First Name, Middle Initial* | Last Name*       | Suffix* | Academic Degrees | Institution                                                                   | Location (city, state/province, country) | Role or Contribution, eg, chair, principal investigator | Group (for manuscripts with more than 1) | Subgroup, eg, Steering Committee |
|-----------------------------|------------------|---------|------------------|-------------------------------------------------------------------------------|------------------------------------------|---------------------------------------------------------|------------------------------------------|----------------------------------|
| Shakaib                     | Rehman           |         |                  | Phoenix VA Healthcare System                                                  |                                          | Co-Investigator                                         |                                          | Clinic Site                      |
| Kelli                       | Bingham          |         |                  | Phoenix VA Healthcare System                                                  |                                          | Coordinator                                             |                                          | Clinic Site                      |
| Suzanne                     | Watnick          |         |                  | Portland VAMC                                                                 |                                          | Principal Investigator                                  |                                          | Clinic Site                      |
| David                       | Cohen            |         |                  | Portland VAMC                                                                 |                                          | Principal Investigator                                  |                                          | Clinic Site                      |
| Jessica                     | Weiss            |         |                  | Portland VAMC                                                                 |                                          | Co-Investigator                                         |                                          | Clinic Site                      |
| Tera                        | Johnston         |         |                  | Portland VAMC                                                                 |                                          | Coordinator                                             |                                          | Clinic Site                      |
| Stephen                     | Giddings         |         |                  | St Louis VA Healthcare System                                                 |                                          | Principal Investigator                                  |                                          | Clinic Site                      |
| Hala                        | Yamout           |         |                  | St Louis VA Healthcare System                                                 |                                          | Principal Investigator                                  |                                          | Clinic Site                      |
| Andrew                      | Klein            |         |                  | St Louis VA Healthcare System                                                 |                                          | Principal Investigator                                  |                                          | Clinic Site                      |
| Caroline                    | Rowe             |         |                  | St Louis VA Healthcare System                                                 |                                          | Co-Investigator                                         |                                          | Clinic Site                      |
| Kristin                     | Vargo            |         |                  | St Louis VA Healthcare System                                                 |                                          | Coordinator                                             |                                          | Clinic Site                      |
| Kristi                      | Waidmann         |         |                  | St Louis VA Healthcare System                                                 |                                          | Coordinator                                             |                                          | Clinic Site                      |
| Vasilios                    | Papademetriou    |         |                  | Washington DC VAMC                                                            |                                          | Principal Investigator                                  |                                          | Clinic Site                      |
| Jean Pierre                 | Elkhoury         |         |                  | Washington DC VAMC                                                            |                                          | Co-Investigator                                         |                                          | Clinic Site                      |
| Barbara                     | Gregory          |         |                  | Washington DC VAMC                                                            |                                          | Coordinator                                             |                                          | Clinic Site                      |
| Susan                       | Amodeo           |         |                  | Washington DC VAMC                                                            |                                          | Coordinator                                             |                                          | Clinic Site                      |
| Mary                        | Bloom            |         |                  | Washington DC VAMC                                                            |                                          | Coordinator                                             |                                          | Clinic Site                      |
| Dalia                       | Goldfarb-Waysman |         |                  | West Los Angeles VA Healthcare Center / Greater Los Angeles Healthcare System |                                          | Principal Investigator                                  |                                          | Clinic Site                      |
| Richard                     | Treger           |         |                  | West Los Angeles VA Healthcare Center / Greater Los Angeles Healthcare System |                                          | Principal Investigator                                  |                                          | Clinic Site                      |

## Supplementary Online Content: Nonauthor Collaborators

\*Indicates required information. Only first name, last name, and suffix will appear in PubMed.

| First Name, Middle Initial* | Last Name*    | Suffix* | Academic Degrees | Institution                                                                   | Location (city, state/province, country) | Role or Contribution, eg, chair, principal investigator | Group (for manuscripts with more than 1) | Subgroup, eg, Steering Committee |
|-----------------------------|---------------|---------|------------------|-------------------------------------------------------------------------------|------------------------------------------|---------------------------------------------------------|------------------------------------------|----------------------------------|
| Mehran                      | Kashefi       |         |                  | West Los Angeles VA Healthcare Center / Greater Los Angeles Healthcare System |                                          | Co-Investigator                                         |                                          | Clinic Site                      |
| Christina                   | Huang         |         |                  | West Los Angeles VA Healthcare Center / Greater Los Angeles Healthcare System |                                          | Co-Principal Investigator                               |                                          | Clinic Site                      |
| Karen                       | Knibloe       |         |                  | West Los Angeles VA Healthcare Center / Greater Los Angeles Healthcare System |                                          | Coordinator                                             |                                          | Clinic Site                      |
| Areef                       | Ishani        |         |                  | Minneapolis VAMC                                                              |                                          | Principal Investigator                                  |                                          | Clinic Site                      |
| Yelena                      | Slinin        |         |                  | Minneapolis VAMC                                                              |                                          | Co-Investigator                                         |                                          | Clinic Site                      |
| Christine                   | Olney         |         |                  | Minneapolis VAMC                                                              |                                          | Coordinator                                             |                                          | Clinic Site                      |
| Jacqueline                  | Rust          |         |                  | Minneapolis VAMC                                                              |                                          | Coordinator                                             |                                          | Clinic Site                      |
| Paolo                       | Fanti         |         |                  | Audie L. Murphy Memorial Veterans Hospital                                    |                                          | Principal Investigator                                  |                                          | Clinic Site                      |
| Christopher                 | Dyer          |         |                  | Audie L. Murphy Memorial Veterans Hospital                                    |                                          | Principal Investigator                                  |                                          | Clinic Site                      |
| Shweta                      | Bansal        |         |                  | Audie L. Murphy Memorial Veterans Hospital                                    |                                          | Co-Investigator                                         |                                          | Clinic Site                      |
| Monica                      | Dunnam        |         |                  | Audie L. Murphy Memorial Veterans Hospital                                    |                                          | Co-Investigator                                         |                                          | Clinic Site                      |
| Lih-Lan                     | Hu            |         |                  | Audie L. Murphy Memorial Veterans Hospital                                    |                                          | Coordinator                                             |                                          | Clinic Site                      |
| Perla                       | Zarate-Abbott |         |                  | Audie L. Murphy Memorial Veterans Hospital                                    |                                          | Coordinator                                             |                                          | Clinic Site                      |
