# Supplementary material
Source: PubMed Central journal article supplement (PMC7941253)
Supplement: jamaneurol-e210178-s004.pdf [file jamaneurol-e210178-s004.pdf]

## Data Sharing Statement

Nasrallah. Association of Intensive vs Standard Blood Pressure Control With Magnetic Resonance Imaging Biomarkers of Alzheimer Disease. *JAMA Neurol*. Published March 08, 2021.

doi:10.1001/jamaneurol.2021.0178

### Data

**Data available:** Yes

**Data types:** Other (please specify)

**Additional Information:** Data used for the analyses in this manuscript will be available on BioLinCC in the summer of 2021.

**How to access data:** Data used for the analyses in this manuscript will be available on BioLinCC in the summer of 2021.
